# Supplementary material
Source: publisher figshare collection journal article supplement (https://asha.figshare.com/ndownloader/files/23073194)
Supplement: Supplementary file 1 [file 23073194]

**Coding Form EBP**

PID 404

Codebook ▾

**Data Dictionary Codebook**

06/10/2020 11:41am

[^ Collapse all instruments](#)

| #                                                                                             | Variable / Field Name                                                   | Field Label<br><i>Field Note</i>                                                                                                    | Field Attributes (Field Type, Validation, Choices, Calculations, etc.)                                                                                                                                                                                                                                                                                                                                                                                                                                                                                               |   |                               |   |                             |   |                           |   |               |   |                               |   |                |   |                   |   |              |   |        |    |              |    |       |
|-----------------------------------------------------------------------------------------------|-------------------------------------------------------------------------|-------------------------------------------------------------------------------------------------------------------------------------|----------------------------------------------------------------------------------------------------------------------------------------------------------------------------------------------------------------------------------------------------------------------------------------------------------------------------------------------------------------------------------------------------------------------------------------------------------------------------------------------------------------------------------------------------------------------|---|-------------------------------|---|-----------------------------|---|---------------------------|---|---------------|---|-------------------------------|---|----------------|---|-------------------|---|--------------|---|--------|----|--------------|----|-------|
| Instrument: <b>Report Characteristics</b> (report_characteristics) <a href="#">^ Collapse</a> |                                                                         |                                                                                                                                     |                                                                                                                                                                                                                                                                                                                                                                                                                                                                                                                                                                      |   |                               |   |                             |   |                           |   |               |   |                               |   |                |   |                   |   |              |   |        |    |              |    |       |
| 1                                                                                             | record_id                                                               | Record ID                                                                                                                           | text                                                                                                                                                                                                                                                                                                                                                                                                                                                                                                                                                                 |   |                               |   |                             |   |                           |   |               |   |                               |   |                |   |                   |   |              |   |        |    |              |    |       |
| 2                                                                                             | title                                                                   | Title of Article                                                                                                                    | text, Required                                                                                                                                                                                                                                                                                                                                                                                                                                                                                                                                                       |   |                               |   |                             |   |                           |   |               |   |                               |   |                |   |                   |   |              |   |        |    |              |    |       |
| 3                                                                                             | author                                                                  | Authors                                                                                                                             | text, Required                                                                                                                                                                                                                                                                                                                                                                                                                                                                                                                                                       |   |                               |   |                             |   |                           |   |               |   |                               |   |                |   |                   |   |              |   |        |    |              |    |       |
| 4                                                                                             | pub_year                                                                | Year Published                                                                                                                      | text, Required                                                                                                                                                                                                                                                                                                                                                                                                                                                                                                                                                       |   |                               |   |                             |   |                           |   |               |   |                               |   |                |   |                   |   |              |   |        |    |              |    |       |
| 5                                                                                             | peer_reviewed                                                           | Peer Reviewed<br><i>If unable to determine, mark NO</i>                                                                             | yesno, Required<br><table border="1"> <tr><td>1</td><td>Yes</td></tr> <tr><td>0</td><td>No</td></tr> </table>                                                                                                                                                                                                                                                                                                                                                                                                                                                        | 1 | Yes                           | 0 | No                          |   |                           |   |               |   |                               |   |                |   |                   |   |              |   |        |    |              |    |       |
| 1                                                                                             | Yes                                                                     |                                                                                                                                     |                                                                                                                                                                                                                                                                                                                                                                                                                                                                                                                                                                      |   |                               |   |                             |   |                           |   |               |   |                               |   |                |   |                   |   |              |   |        |    |              |    |       |
| 0                                                                                             | No                                                                      |                                                                                                                                     |                                                                                                                                                                                                                                                                                                                                                                                                                                                                                                                                                                      |   |                               |   |                             |   |                           |   |               |   |                               |   |                |   |                   |   |              |   |        |    |              |    |       |
| 6                                                                                             | source_type                                                             | Source Type<br><i>add the "other" source in the "additional information" field (end of this section)</i>                            | radio, Required<br><table border="1"> <tr><td>1</td><td>peer reviewed journal article</td></tr> <tr><td>2</td><td>open source journal article</td></tr> <tr><td>3</td><td>systematic review</td></tr> <tr><td>4</td><td>meta-analysis</td></tr> <tr><td>5</td><td>conference paper/presentation</td></tr> <tr><td>6</td><td>private report</td></tr> <tr><td>7</td><td>government report</td></tr> <tr><td>8</td><td>dissertation</td></tr> <tr><td>9</td><td>thesis</td></tr> <tr><td>10</td><td>book/chapter</td></tr> <tr><td>11</td><td>other</td></tr> </table> | 1 | peer reviewed journal article | 2 | open source journal article | 3 | systematic review         | 4 | meta-analysis | 5 | conference paper/presentation | 6 | private report | 7 | government report | 8 | dissertation | 9 | thesis | 10 | book/chapter | 11 | other |
| 1                                                                                             | peer reviewed journal article                                           |                                                                                                                                     |                                                                                                                                                                                                                                                                                                                                                                                                                                                                                                                                                                      |   |                               |   |                             |   |                           |   |               |   |                               |   |                |   |                   |   |              |   |        |    |              |    |       |
| 2                                                                                             | open source journal article                                             |                                                                                                                                     |                                                                                                                                                                                                                                                                                                                                                                                                                                                                                                                                                                      |   |                               |   |                             |   |                           |   |               |   |                               |   |                |   |                   |   |              |   |        |    |              |    |       |
| 3                                                                                             | systematic review                                                       |                                                                                                                                     |                                                                                                                                                                                                                                                                                                                                                                                                                                                                                                                                                                      |   |                               |   |                             |   |                           |   |               |   |                               |   |                |   |                   |   |              |   |        |    |              |    |       |
| 4                                                                                             | meta-analysis                                                           |                                                                                                                                     |                                                                                                                                                                                                                                                                                                                                                                                                                                                                                                                                                                      |   |                               |   |                             |   |                           |   |               |   |                               |   |                |   |                   |   |              |   |        |    |              |    |       |
| 5                                                                                             | conference paper/presentation                                           |                                                                                                                                     |                                                                                                                                                                                                                                                                                                                                                                                                                                                                                                                                                                      |   |                               |   |                             |   |                           |   |               |   |                               |   |                |   |                   |   |              |   |        |    |              |    |       |
| 6                                                                                             | private report                                                          |                                                                                                                                     |                                                                                                                                                                                                                                                                                                                                                                                                                                                                                                                                                                      |   |                               |   |                             |   |                           |   |               |   |                               |   |                |   |                   |   |              |   |        |    |              |    |       |
| 7                                                                                             | government report                                                       |                                                                                                                                     |                                                                                                                                                                                                                                                                                                                                                                                                                                                                                                                                                                      |   |                               |   |                             |   |                           |   |               |   |                               |   |                |   |                   |   |              |   |        |    |              |    |       |
| 8                                                                                             | dissertation                                                            |                                                                                                                                     |                                                                                                                                                                                                                                                                                                                                                                                                                                                                                                                                                                      |   |                               |   |                             |   |                           |   |               |   |                               |   |                |   |                   |   |              |   |        |    |              |    |       |
| 9                                                                                             | thesis                                                                  |                                                                                                                                     |                                                                                                                                                                                                                                                                                                                                                                                                                                                                                                                                                                      |   |                               |   |                             |   |                           |   |               |   |                               |   |                |   |                   |   |              |   |        |    |              |    |       |
| 10                                                                                            | book/chapter                                                            |                                                                                                                                     |                                                                                                                                                                                                                                                                                                                                                                                                                                                                                                                                                                      |   |                               |   |                             |   |                           |   |               |   |                               |   |                |   |                   |   |              |   |        |    |              |    |       |
| 11                                                                                            | other                                                                   |                                                                                                                                     |                                                                                                                                                                                                                                                                                                                                                                                                                                                                                                                                                                      |   |                               |   |                             |   |                           |   |               |   |                               |   |                |   |                   |   |              |   |        |    |              |    |       |
| 7                                                                                             | study_design                                                            | Study Design<br><i>add the "other" source in the "additional information" field (end of this section)</i>                           | radio, Required<br><table border="1"> <tr><td>1</td><td>experimental</td></tr> <tr><td>2</td><td>quasi-experimental</td></tr> <tr><td>3</td><td>single subject</td></tr> <tr><td>4</td><td>case study</td></tr> <tr><td>5</td><td>other</td></tr> </table>                                                                                                                                                                                                                                                                                                           | 1 | experimental                  | 2 | quasi-experimental          | 3 | single subject            | 4 | case study    | 5 | other                         |   |                |   |                   |   |              |   |        |    |              |    |       |
| 1                                                                                             | experimental                                                            |                                                                                                                                     |                                                                                                                                                                                                                                                                                                                                                                                                                                                                                                                                                                      |   |                               |   |                             |   |                           |   |               |   |                               |   |                |   |                   |   |              |   |        |    |              |    |       |
| 2                                                                                             | quasi-experimental                                                      |                                                                                                                                     |                                                                                                                                                                                                                                                                                                                                                                                                                                                                                                                                                                      |   |                               |   |                             |   |                           |   |               |   |                               |   |                |   |                   |   |              |   |        |    |              |    |       |
| 3                                                                                             | single subject                                                          |                                                                                                                                     |                                                                                                                                                                                                                                                                                                                                                                                                                                                                                                                                                                      |   |                               |   |                             |   |                           |   |               |   |                               |   |                |   |                   |   |              |   |        |    |              |    |       |
| 4                                                                                             | case study                                                              |                                                                                                                                     |                                                                                                                                                                                                                                                                                                                                                                                                                                                                                                                                                                      |   |                               |   |                             |   |                           |   |               |   |                               |   |                |   |                   |   |              |   |        |    |              |    |       |
| 5                                                                                             | other                                                                   |                                                                                                                                     |                                                                                                                                                                                                                                                                                                                                                                                                                                                                                                                                                                      |   |                               |   |                             |   |                           |   |               |   |                               |   |                |   |                   |   |              |   |        |    |              |    |       |
| 8                                                                                             | production                                                              | Organization that produced the report?<br><i>add the "other" source in the "additional information" field (end of this section)</i> | radio, Required<br><table border="1"> <tr><td>1</td><td>university</td></tr> <tr><td>2</td><td>government agency</td></tr> <tr><td>3</td><td>contract research firm</td></tr> <tr><td>4</td><td>other</td></tr> </table>                                                                                                                                                                                                                                                                                                                                             | 1 | university                    | 2 | government agency           | 3 | contract research firm    | 4 | other         |   |                               |   |                |   |                   |   |              |   |        |    |              |    |       |
| 1                                                                                             | university                                                              |                                                                                                                                     |                                                                                                                                                                                                                                                                                                                                                                                                                                                                                                                                                                      |   |                               |   |                             |   |                           |   |               |   |                               |   |                |   |                   |   |              |   |        |    |              |    |       |
| 2                                                                                             | government agency                                                       |                                                                                                                                     |                                                                                                                                                                                                                                                                                                                                                                                                                                                                                                                                                                      |   |                               |   |                             |   |                           |   |               |   |                               |   |                |   |                   |   |              |   |        |    |              |    |       |
| 3                                                                                             | contract research firm                                                  |                                                                                                                                     |                                                                                                                                                                                                                                                                                                                                                                                                                                                                                                                                                                      |   |                               |   |                             |   |                           |   |               |   |                               |   |                |   |                   |   |              |   |        |    |              |    |       |
| 4                                                                                             | other                                                                   |                                                                                                                                     |                                                                                                                                                                                                                                                                                                                                                                                                                                                                                                                                                                      |   |                               |   |                             |   |                           |   |               |   |                               |   |                |   |                   |   |              |   |        |    |              |    |       |
| 9                                                                                             | funding_source                                                          | Research conducted using funds from a grant or other sponsor?                                                                       | radio, Required<br><table border="1"> <tr><td>1</td><td>Yes</td></tr> <tr><td>2</td><td>No</td></tr> <tr><td>3</td><td>Not identified/can't tell</td></tr> </table>                                                                                                                                                                                                                                                                                                                                                                                                  | 1 | Yes                           | 2 | No                          | 3 | Not identified/can't tell |   |               |   |                               |   |                |   |                   |   |              |   |        |    |              |    |       |
| 1                                                                                             | Yes                                                                     |                                                                                                                                     |                                                                                                                                                                                                                                                                                                                                                                                                                                                                                                                                                                      |   |                               |   |                             |   |                           |   |               |   |                               |   |                |   |                   |   |              |   |        |    |              |    |       |
| 2                                                                                             | No                                                                      |                                                                                                                                     |                                                                                                                                                                                                                                                                                                                                                                                                                                                                                                                                                                      |   |                               |   |                             |   |                           |   |               |   |                               |   |                |   |                   |   |              |   |        |    |              |    |       |
| 3                                                                                             | Not identified/can't tell                                               |                                                                                                                                     |                                                                                                                                                                                                                                                                                                                                                                                                                                                                                                                                                                      |   |                               |   |                             |   |                           |   |               |   |                               |   |                |   |                   |   |              |   |        |    |              |    |       |
| 10                                                                                            | funding_branch<br><i>Show the field ONLY if: [funding_source] = '1'</i> | Who provided the funds?                                                                                                             | text                                                                                                                                                                                                                                                                                                                                                                                                                                                                                                                                                                 |   |                               |   |                             |   |                           |   |               |   |                               |   |                |   |                   |   |              |   |        |    |              |    |       |

|                                                                              |                                                                                      |                                                                                                 |                                                                                                                                                                                                                                                                                                                                                                                                                                                                                                                                                                                              |   |                         |                                      |            |                         |                                                 |   |                         |                        |   |                         |                              |   |                         |                           |   |                         |                                   |
|------------------------------------------------------------------------------|--------------------------------------------------------------------------------------|-------------------------------------------------------------------------------------------------|----------------------------------------------------------------------------------------------------------------------------------------------------------------------------------------------------------------------------------------------------------------------------------------------------------------------------------------------------------------------------------------------------------------------------------------------------------------------------------------------------------------------------------------------------------------------------------------------|---|-------------------------|--------------------------------------|------------|-------------------------|-------------------------------------------------|---|-------------------------|------------------------|---|-------------------------|------------------------------|---|-------------------------|---------------------------|---|-------------------------|-----------------------------------|
| 11                                                                           | additional_clarifying                                                                | Additional Information<br><i>be sure to include section of information (e.g., study design)</i> | text                                                                                                                                                                                                                                                                                                                                                                                                                                                                                                                                                                                         |   |                         |                                      |            |                         |                                                 |   |                         |                        |   |                         |                              |   |                         |                           |   |                         |                                   |
| 12                                                                           | report_characteristics_complete                                                      | Section Header: <i>Form Status</i><br>Complete?                                                 | dropdown<br><table border="1"> <tr><td>0</td><td>Incomplete</td></tr> <tr><td>1</td><td>Unverified</td></tr> <tr><td>2</td><td>Complete</td></tr> </table>                                                                                                                                                                                                                                                                                                                                                                                                                                   | 0 | Incomplete              | 1                                    | Unverified | 2                       | Complete                                        |   |                         |                        |   |                         |                              |   |                         |                           |   |                         |                                   |
| 0                                                                            | Incomplete                                                                           |                                                                                                 |                                                                                                                                                                                                                                                                                                                                                                                                                                                                                                                                                                                              |   |                         |                                      |            |                         |                                                 |   |                         |                        |   |                         |                              |   |                         |                           |   |                         |                                   |
| 1                                                                            | Unverified                                                                           |                                                                                                 |                                                                                                                                                                                                                                                                                                                                                                                                                                                                                                                                                                                              |   |                         |                                      |            |                         |                                                 |   |                         |                        |   |                         |                              |   |                         |                           |   |                         |                                   |
| 2                                                                            | Complete                                                                             |                                                                                                 |                                                                                                                                                                                                                                                                                                                                                                                                                                                                                                                                                                                              |   |                         |                                      |            |                         |                                                 |   |                         |                        |   |                         |                              |   |                         |                           |   |                         |                                   |
| Instrument: <b>Participant Characteristics</b> (participant_characteristics) |                                                                                      |                                                                                                 | <a href="#">^ Collapse</a>                                                                                                                                                                                                                                                                                                                                                                                                                                                                                                                                                                   |   |                         |                                      |            |                         |                                                 |   |                         |                        |   |                         |                              |   |                         |                           |   |                         |                                   |
| 13                                                                           | control_y_n                                                                          | Was a control/comparison group used in the study?                                               | radio, Required<br><table border="1"> <tr><td>1</td><td>Yes</td></tr> <tr><td>2</td><td>No</td></tr> <tr><td>3</td><td>Unknown</td></tr> </table>                                                                                                                                                                                                                                                                                                                                                                                                                                            | 1 | Yes                     | 2                                    | No         | 3                       | Unknown                                         |   |                         |                        |   |                         |                              |   |                         |                           |   |                         |                                   |
| 1                                                                            | Yes                                                                                  |                                                                                                 |                                                                                                                                                                                                                                                                                                                                                                                                                                                                                                                                                                                              |   |                         |                                      |            |                         |                                                 |   |                         |                        |   |                         |                              |   |                         |                           |   |                         |                                   |
| 2                                                                            | No                                                                                   |                                                                                                 |                                                                                                                                                                                                                                                                                                                                                                                                                                                                                                                                                                                              |   |                         |                                      |            |                         |                                                 |   |                         |                        |   |                         |                              |   |                         |                           |   |                         |                                   |
| 3                                                                            | Unknown                                                                              |                                                                                                 |                                                                                                                                                                                                                                                                                                                                                                                                                                                                                                                                                                                              |   |                         |                                      |            |                         |                                                 |   |                         |                        |   |                         |                              |   |                         |                           |   |                         |                                   |
| 14                                                                           | sample_size                                                                          | What is the total sample size?                                                                  | text (number), Required                                                                                                                                                                                                                                                                                                                                                                                                                                                                                                                                                                      |   |                         |                                      |            |                         |                                                 |   |                         |                        |   |                         |                              |   |                         |                           |   |                         |                                   |
| 15                                                                           | samplesize2<br><small>Show the field ONLY if:<br/>[control_y_n] = '1'</small>        | What was the sample size of each group?                                                         | text                                                                                                                                                                                                                                                                                                                                                                                                                                                                                                                                                                                         |   |                         |                                      |            |                         |                                                 |   |                         |                        |   |                         |                              |   |                         |                           |   |                         |                                   |
| 16                                                                           | disability                                                                           | Which labels best match those applied to the study sample?                                      | checkbox, Required<br><table border="1"> <tr><td>1</td><td>disability__1</td><td>specific language impairment (SLI)</td></tr> <tr><td>2</td><td>disability__2</td><td>learning disabled (LD)</td></tr> <tr><td>3</td><td>disability__3</td><td>at-risk</td></tr> <tr><td>4</td><td>disability__4</td><td>average/typically developing</td></tr> <tr><td>5</td><td>disability__5</td><td>mental-age matched</td></tr> <tr><td>6</td><td>disability__6</td><td>high achieving</td></tr> </table>                                                                                               | 1 | disability__1           | specific language impairment (SLI)   | 2          | disability__2           | learning disabled (LD)                          | 3 | disability__3           | at-risk                | 4 | disability__4           | average/typically developing | 5 | disability__5           | mental-age matched        | 6 | disability__6           | high achieving                    |
| 1                                                                            | disability__1                                                                        | specific language impairment (SLI)                                                              |                                                                                                                                                                                                                                                                                                                                                                                                                                                                                                                                                                                              |   |                         |                                      |            |                         |                                                 |   |                         |                        |   |                         |                              |   |                         |                           |   |                         |                                   |
| 2                                                                            | disability__2                                                                        | learning disabled (LD)                                                                          |                                                                                                                                                                                                                                                                                                                                                                                                                                                                                                                                                                                              |   |                         |                                      |            |                         |                                                 |   |                         |                        |   |                         |                              |   |                         |                           |   |                         |                                   |
| 3                                                                            | disability__3                                                                        | at-risk                                                                                         |                                                                                                                                                                                                                                                                                                                                                                                                                                                                                                                                                                                              |   |                         |                                      |            |                         |                                                 |   |                         |                        |   |                         |                              |   |                         |                           |   |                         |                                   |
| 4                                                                            | disability__4                                                                        | average/typically developing                                                                    |                                                                                                                                                                                                                                                                                                                                                                                                                                                                                                                                                                                              |   |                         |                                      |            |                         |                                                 |   |                         |                        |   |                         |                              |   |                         |                           |   |                         |                                   |
| 5                                                                            | disability__5                                                                        | mental-age matched                                                                              |                                                                                                                                                                                                                                                                                                                                                                                                                                                                                                                                                                                              |   |                         |                                      |            |                         |                                                 |   |                         |                        |   |                         |                              |   |                         |                           |   |                         |                                   |
| 6                                                                            | disability__6                                                                        | high achieving                                                                                  |                                                                                                                                                                                                                                                                                                                                                                                                                                                                                                                                                                                              |   |                         |                                      |            |                         |                                                 |   |                         |                        |   |                         |                              |   |                         |                           |   |                         |                                   |
| 17                                                                           | language_used                                                                        | Primary Language of Participants (e.g., English)                                                | text, Required                                                                                                                                                                                                                                                                                                                                                                                                                                                                                                                                                                               |   |                         |                                      |            |                         |                                                 |   |                         |                        |   |                         |                              |   |                         |                           |   |                         |                                   |
| 18                                                                           | diagnoses                                                                            | Participants included because of learning or language disability status?                        | radio, Required<br><table border="1"> <tr><td>1</td><td>Yes</td></tr> <tr><td>2</td><td>No</td></tr> <tr><td>3</td><td>Unclear</td></tr> </table>                                                                                                                                                                                                                                                                                                                                                                                                                                            | 1 | Yes                     | 2                                    | No         | 3                       | Unclear                                         |   |                         |                        |   |                         |                              |   |                         |                           |   |                         |                                   |
| 1                                                                            | Yes                                                                                  |                                                                                                 |                                                                                                                                                                                                                                                                                                                                                                                                                                                                                                                                                                                              |   |                         |                                      |            |                         |                                                 |   |                         |                        |   |                         |                              |   |                         |                           |   |                         |                                   |
| 2                                                                            | No                                                                                   |                                                                                                 |                                                                                                                                                                                                                                                                                                                                                                                                                                                                                                                                                                                              |   |                         |                                      |            |                         |                                                 |   |                         |                        |   |                         |                              |   |                         |                           |   |                         |                                   |
| 3                                                                            | Unclear                                                                              |                                                                                                 |                                                                                                                                                                                                                                                                                                                                                                                                                                                                                                                                                                                              |   |                         |                                      |            |                         |                                                 |   |                         |                        |   |                         |                              |   |                         |                           |   |                         |                                   |
| 19                                                                           | diagnosis_categories<br><small>Show the field ONLY if:<br/>[diagnoses] = '1'</small> | Diagnoses                                                                                       | checkbox, Required<br><table border="1"> <tr><td>1</td><td>diagnosis_categories__1</td><td>language disability/impairment (SLI)</td></tr> <tr><td>2</td><td>diagnosis_categories__2</td><td>learning disability/impairment (LD)</td></tr> <tr><td>3</td><td>diagnosis_categories__3</td><td>at-risk (sub-clinical)</td></tr> <tr><td>4</td><td>diagnosis_categories__4</td><td>Autism</td></tr> <tr><td>5</td><td>diagnosis_categories__5</td><td>Multiple Impairments (MU)</td></tr> <tr><td>6</td><td>diagnosis_categories__6</td><td>Mildly cognitively impaired (MCI)</td></tr> </table> | 1 | diagnosis_categories__1 | language disability/impairment (SLI) | 2          | diagnosis_categories__2 | learning disability/impairment (LD)             | 3 | diagnosis_categories__3 | at-risk (sub-clinical) | 4 | diagnosis_categories__4 | Autism                       | 5 | diagnosis_categories__5 | Multiple Impairments (MU) | 6 | diagnosis_categories__6 | Mildly cognitively impaired (MCI) |
| 1                                                                            | diagnosis_categories__1                                                              | language disability/impairment (SLI)                                                            |                                                                                                                                                                                                                                                                                                                                                                                                                                                                                                                                                                                              |   |                         |                                      |            |                         |                                                 |   |                         |                        |   |                         |                              |   |                         |                           |   |                         |                                   |
| 2                                                                            | diagnosis_categories__2                                                              | learning disability/impairment (LD)                                                             |                                                                                                                                                                                                                                                                                                                                                                                                                                                                                                                                                                                              |   |                         |                                      |            |                         |                                                 |   |                         |                        |   |                         |                              |   |                         |                           |   |                         |                                   |
| 3                                                                            | diagnosis_categories__3                                                              | at-risk (sub-clinical)                                                                          |                                                                                                                                                                                                                                                                                                                                                                                                                                                                                                                                                                                              |   |                         |                                      |            |                         |                                                 |   |                         |                        |   |                         |                              |   |                         |                           |   |                         |                                   |
| 4                                                                            | diagnosis_categories__4                                                              | Autism                                                                                          |                                                                                                                                                                                                                                                                                                                                                                                                                                                                                                                                                                                              |   |                         |                                      |            |                         |                                                 |   |                         |                        |   |                         |                              |   |                         |                           |   |                         |                                   |
| 5                                                                            | diagnosis_categories__5                                                              | Multiple Impairments (MU)                                                                       |                                                                                                                                                                                                                                                                                                                                                                                                                                                                                                                                                                                              |   |                         |                                      |            |                         |                                                 |   |                         |                        |   |                         |                              |   |                         |                           |   |                         |                                   |
| 6                                                                            | diagnosis_categories__6                                                              | Mildly cognitively impaired (MCI)                                                               |                                                                                                                                                                                                                                                                                                                                                                                                                                                                                                                                                                                              |   |                         |                                      |            |                         |                                                 |   |                         |                        |   |                         |                              |   |                         |                           |   |                         |                                   |
| 20                                                                           | intervention                                                                         | What types of intervention were participants receiving (or had they previously been receiving)? | checkbox, Required<br><table border="1"> <tr><td>1</td><td>intervention__1</td><td>speech (private or school-based)</td></tr> <tr><td>2</td><td>intervention__2</td><td>special education (resource, IEP for academics)</td></tr> <tr><td>3</td><td>intervention__3</td><td>behavioral</td></tr> <tr><td>4</td><td>intervention__4</td><td>tutoring</td></tr> <tr><td>5</td><td>intervention__5</td><td>not stated/unclear</td></tr> <tr><td>6</td><td>intervention__6</td><td>other</td></tr> </table>                                                                                      | 1 | intervention__1         | speech (private or school-based)     | 2          | intervention__2         | special education (resource, IEP for academics) | 3 | intervention__3         | behavioral             | 4 | intervention__4         | tutoring                     | 5 | intervention__5         | not stated/unclear        | 6 | intervention__6         | other                             |
| 1                                                                            | intervention__1                                                                      | speech (private or school-based)                                                                |                                                                                                                                                                                                                                                                                                                                                                                                                                                                                                                                                                                              |   |                         |                                      |            |                         |                                                 |   |                         |                        |   |                         |                              |   |                         |                           |   |                         |                                   |
| 2                                                                            | intervention__2                                                                      | special education (resource, IEP for academics)                                                 |                                                                                                                                                                                                                                                                                                                                                                                                                                                                                                                                                                                              |   |                         |                                      |            |                         |                                                 |   |                         |                        |   |                         |                              |   |                         |                           |   |                         |                                   |
| 3                                                                            | intervention__3                                                                      | behavioral                                                                                      |                                                                                                                                                                                                                                                                                                                                                                                                                                                                                                                                                                                              |   |                         |                                      |            |                         |                                                 |   |                         |                        |   |                         |                              |   |                         |                           |   |                         |                                   |
| 4                                                                            | intervention__4                                                                      | tutoring                                                                                        |                                                                                                                                                                                                                                                                                                                                                                                                                                                                                                                                                                                              |   |                         |                                      |            |                         |                                                 |   |                         |                        |   |                         |                              |   |                         |                           |   |                         |                                   |
| 5                                                                            | intervention__5                                                                      | not stated/unclear                                                                              |                                                                                                                                                                                                                                                                                                                                                                                                                                                                                                                                                                                              |   |                         |                                      |            |                         |                                                 |   |                         |                        |   |                         |                              |   |                         |                           |   |                         |                                   |
| 6                                                                            | intervention__6                                                                      | other                                                                                           |                                                                                                                                                                                                                                                                                                                                                                                                                                                                                                                                                                                              |   |                         |                                      |            |                         |                                                 |   |                         |                        |   |                         |                              |   |                         |                           |   |                         |                                   |

|    |                                                                      |                                                                                                                             |                                                                                                                                                                                                                                                                                                                                                                                                                                                                                                                                                                                                |   |                         |                    |                                            |             |                              |   |                 |                        |           |             |                  |   |                |         |   |             |               |   |             |                      |   |             |                    |   |        |     |
|----|----------------------------------------------------------------------|-----------------------------------------------------------------------------------------------------------------------------|------------------------------------------------------------------------------------------------------------------------------------------------------------------------------------------------------------------------------------------------------------------------------------------------------------------------------------------------------------------------------------------------------------------------------------------------------------------------------------------------------------------------------------------------------------------------------------------------|---|-------------------------|--------------------|--------------------------------------------|-------------|------------------------------|---|-----------------|------------------------|-----------|-------------|------------------|---|----------------|---------|---|-------------|---------------|---|-------------|----------------------|---|-------------|--------------------|---|--------|-----|
| 21 | control<br>Show the field ONLY if:<br>[control_y_n] = '1'            | Were control participants matched for performance in language and learning or typically developing/average?                 | radio, Required<br><table border="1"> <tr><td>1</td><td>performance level match</td></tr> <tr><td>2</td><td>chronological age match with average peers</td></tr> <tr><td>3</td><td>mental age match</td></tr> <tr><td>4</td><td>unclear</td></tr> </table>                                                                                                                                                                                                                                                                                                                                     | 1 | performance level match | 2                  | chronological age match with average peers | 3           | mental age match             | 4 | unclear         |                        |           |             |                  |   |                |         |   |             |               |   |             |                      |   |             |                    |   |        |     |
| 1  | performance level match                                              |                                                                                                                             |                                                                                                                                                                                                                                                                                                                                                                                                                                                                                                                                                                                                |   |                         |                    |                                            |             |                              |   |                 |                        |           |             |                  |   |                |         |   |             |               |   |             |                      |   |             |                    |   |        |     |
| 2  | chronological age match with average peers                           |                                                                                                                             |                                                                                                                                                                                                                                                                                                                                                                                                                                                                                                                                                                                                |   |                         |                    |                                            |             |                              |   |                 |                        |           |             |                  |   |                |         |   |             |               |   |             |                      |   |             |                    |   |        |     |
| 3  | mental age match                                                     |                                                                                                                             |                                                                                                                                                                                                                                                                                                                                                                                                                                                                                                                                                                                                |   |                         |                    |                                            |             |                              |   |                 |                        |           |             |                  |   |                |         |   |             |               |   |             |                      |   |             |                    |   |        |     |
| 4  | unclear                                                              |                                                                                                                             |                                                                                                                                                                                                                                                                                                                                                                                                                                                                                                                                                                                                |   |                         |                    |                                            |             |                              |   |                 |                        |           |             |                  |   |                |         |   |             |               |   |             |                      |   |             |                    |   |        |     |
| 22 | dis_type                                                             | If participants in study were delayed/impaired in learning and/or language, which areas were affected?                      | checkbox, Required<br><table border="1"> <tr><td>1</td><td>dis_type__1</td><td>receptive language</td></tr> <tr><td>2</td><td>dis_type__2</td><td>expressive language</td></tr> <tr><td>3</td><td>dis_type__3</td><td>language comprehension</td></tr> <tr><td>4</td><td>dis_type__4</td><td>reading/decoding</td></tr> <tr><td>5</td><td>dis_type__5</td><td>writing</td></tr> <tr><td>6</td><td>dis_type__6</td><td>oral language</td></tr> <tr><td>7</td><td>dis_type__7</td><td>academic performance</td></tr> <tr><td>8</td><td>dis_type__8</td><td>articulation/motor</td></tr> </table> | 1 | dis_type__1             | receptive language | 2                                          | dis_type__2 | expressive language          | 3 | dis_type__3     | language comprehension | 4         | dis_type__4 | reading/decoding | 5 | dis_type__5    | writing | 6 | dis_type__6 | oral language | 7 | dis_type__7 | academic performance | 8 | dis_type__8 | articulation/motor |   |        |     |
| 1  | dis_type__1                                                          | receptive language                                                                                                          |                                                                                                                                                                                                                                                                                                                                                                                                                                                                                                                                                                                                |   |                         |                    |                                            |             |                              |   |                 |                        |           |             |                  |   |                |         |   |             |               |   |             |                      |   |             |                    |   |        |     |
| 2  | dis_type__2                                                          | expressive language                                                                                                         |                                                                                                                                                                                                                                                                                                                                                                                                                                                                                                                                                                                                |   |                         |                    |                                            |             |                              |   |                 |                        |           |             |                  |   |                |         |   |             |               |   |             |                      |   |             |                    |   |        |     |
| 3  | dis_type__3                                                          | language comprehension                                                                                                      |                                                                                                                                                                                                                                                                                                                                                                                                                                                                                                                                                                                                |   |                         |                    |                                            |             |                              |   |                 |                        |           |             |                  |   |                |         |   |             |               |   |             |                      |   |             |                    |   |        |     |
| 4  | dis_type__4                                                          | reading/decoding                                                                                                            |                                                                                                                                                                                                                                                                                                                                                                                                                                                                                                                                                                                                |   |                         |                    |                                            |             |                              |   |                 |                        |           |             |                  |   |                |         |   |             |               |   |             |                      |   |             |                    |   |        |     |
| 5  | dis_type__5                                                          | writing                                                                                                                     |                                                                                                                                                                                                                                                                                                                                                                                                                                                                                                                                                                                                |   |                         |                    |                                            |             |                              |   |                 |                        |           |             |                  |   |                |         |   |             |               |   |             |                      |   |             |                    |   |        |     |
| 6  | dis_type__6                                                          | oral language                                                                                                               |                                                                                                                                                                                                                                                                                                                                                                                                                                                                                                                                                                                                |   |                         |                    |                                            |             |                              |   |                 |                        |           |             |                  |   |                |         |   |             |               |   |             |                      |   |             |                    |   |        |     |
| 7  | dis_type__7                                                          | academic performance                                                                                                        |                                                                                                                                                                                                                                                                                                                                                                                                                                                                                                                                                                                                |   |                         |                    |                                            |             |                              |   |                 |                        |           |             |                  |   |                |         |   |             |               |   |             |                      |   |             |                    |   |        |     |
| 8  | dis_type__8                                                          | articulation/motor                                                                                                          |                                                                                                                                                                                                                                                                                                                                                                                                                                                                                                                                                                                                |   |                         |                    |                                            |             |                              |   |                 |                        |           |             |                  |   |                |         |   |             |               |   |             |                      |   |             |                    |   |        |     |
| 23 | ses                                                                  | What was the SES of students in the sample?                                                                                 | radio, Required<br><table border="1"> <tr><td>1</td><td>low SES</td></tr> <tr><td>2</td><td>low-middle SES</td></tr> <tr><td>3</td><td>middle SES</td></tr> <tr><td>4</td><td>middle-high SES</td></tr> <tr><td>5</td><td>high SES</td></tr> <tr><td>6</td><td>labeled as mixed</td></tr> <tr><td>7</td><td>not identified</td></tr> </table>                                                                                                                                                                                                                                                  | 1 | low SES                 | 2                  | low-middle SES                             | 3           | middle SES                   | 4 | middle-high SES | 5                      | high SES  | 6           | labeled as mixed | 7 | not identified |         |   |             |               |   |             |                      |   |             |                    |   |        |     |
| 1  | low SES                                                              |                                                                                                                             |                                                                                                                                                                                                                                                                                                                                                                                                                                                                                                                                                                                                |   |                         |                    |                                            |             |                              |   |                 |                        |           |             |                  |   |                |         |   |             |               |   |             |                      |   |             |                    |   |        |     |
| 2  | low-middle SES                                                       |                                                                                                                             |                                                                                                                                                                                                                                                                                                                                                                                                                                                                                                                                                                                                |   |                         |                    |                                            |             |                              |   |                 |                        |           |             |                  |   |                |         |   |             |               |   |             |                      |   |             |                    |   |        |     |
| 3  | middle SES                                                           |                                                                                                                             |                                                                                                                                                                                                                                                                                                                                                                                                                                                                                                                                                                                                |   |                         |                    |                                            |             |                              |   |                 |                        |           |             |                  |   |                |         |   |             |               |   |             |                      |   |             |                    |   |        |     |
| 4  | middle-high SES                                                      |                                                                                                                             |                                                                                                                                                                                                                                                                                                                                                                                                                                                                                                                                                                                                |   |                         |                    |                                            |             |                              |   |                 |                        |           |             |                  |   |                |         |   |             |               |   |             |                      |   |             |                    |   |        |     |
| 5  | high SES                                                             |                                                                                                                             |                                                                                                                                                                                                                                                                                                                                                                                                                                                                                                                                                                                                |   |                         |                    |                                            |             |                              |   |                 |                        |           |             |                  |   |                |         |   |             |               |   |             |                      |   |             |                    |   |        |     |
| 6  | labeled as mixed                                                     |                                                                                                                             |                                                                                                                                                                                                                                                                                                                                                                                                                                                                                                                                                                                                |   |                         |                    |                                            |             |                              |   |                 |                        |           |             |                  |   |                |         |   |             |               |   |             |                      |   |             |                    |   |        |     |
| 7  | not identified                                                       |                                                                                                                             |                                                                                                                                                                                                                                                                                                                                                                                                                                                                                                                                                                                                |   |                         |                    |                                            |             |                              |   |                 |                        |           |             |                  |   |                |         |   |             |               |   |             |                      |   |             |                    |   |        |     |
| 24 | age                                                                  | What were the ages (in years) for the students in the sample?                                                               | checkbox<br><table border="1"> <tr><td>1</td><td>age__1</td><td>&lt; 9</td></tr> <tr><td>2</td><td>age__2</td><td>9</td></tr> <tr><td>3</td><td>age__3</td><td>10</td></tr> <tr><td>4</td><td>age__4</td><td>11</td></tr> <tr><td>5</td><td>age__5</td><td>12</td></tr> <tr><td>6</td><td>age__6</td><td>13</td></tr> <tr><td>7</td><td>age__7</td><td>14</td></tr> <tr><td>8</td><td>age__8</td><td>15</td></tr> <tr><td>9</td><td>age__9</td><td>&gt;15</td></tr> </table>                                                                                                                   | 1 | age__1                  | < 9                | 2                                          | age__2      | 9                            | 3 | age__3          | 10                     | 4         | age__4      | 11               | 5 | age__5         | 12      | 6 | age__6      | 13            | 7 | age__7      | 14                   | 8 | age__8      | 15                 | 9 | age__9 | >15 |
| 1  | age__1                                                               | < 9                                                                                                                         |                                                                                                                                                                                                                                                                                                                                                                                                                                                                                                                                                                                                |   |                         |                    |                                            |             |                              |   |                 |                        |           |             |                  |   |                |         |   |             |               |   |             |                      |   |             |                    |   |        |     |
| 2  | age__2                                                               | 9                                                                                                                           |                                                                                                                                                                                                                                                                                                                                                                                                                                                                                                                                                                                                |   |                         |                    |                                            |             |                              |   |                 |                        |           |             |                  |   |                |         |   |             |               |   |             |                      |   |             |                    |   |        |     |
| 3  | age__3                                                               | 10                                                                                                                          |                                                                                                                                                                                                                                                                                                                                                                                                                                                                                                                                                                                                |   |                         |                    |                                            |             |                              |   |                 |                        |           |             |                  |   |                |         |   |             |               |   |             |                      |   |             |                    |   |        |     |
| 4  | age__4                                                               | 11                                                                                                                          |                                                                                                                                                                                                                                                                                                                                                                                                                                                                                                                                                                                                |   |                         |                    |                                            |             |                              |   |                 |                        |           |             |                  |   |                |         |   |             |               |   |             |                      |   |             |                    |   |        |     |
| 5  | age__5                                                               | 12                                                                                                                          |                                                                                                                                                                                                                                                                                                                                                                                                                                                                                                                                                                                                |   |                         |                    |                                            |             |                              |   |                 |                        |           |             |                  |   |                |         |   |             |               |   |             |                      |   |             |                    |   |        |     |
| 6  | age__6                                                               | 13                                                                                                                          |                                                                                                                                                                                                                                                                                                                                                                                                                                                                                                                                                                                                |   |                         |                    |                                            |             |                              |   |                 |                        |           |             |                  |   |                |         |   |             |               |   |             |                      |   |             |                    |   |        |     |
| 7  | age__7                                                               | 14                                                                                                                          |                                                                                                                                                                                                                                                                                                                                                                                                                                                                                                                                                                                                |   |                         |                    |                                            |             |                              |   |                 |                        |           |             |                  |   |                |         |   |             |               |   |             |                      |   |             |                    |   |        |     |
| 8  | age__8                                                               | 15                                                                                                                          |                                                                                                                                                                                                                                                                                                                                                                                                                                                                                                                                                                                                |   |                         |                    |                                            |             |                              |   |                 |                        |           |             |                  |   |                |         |   |             |               |   |             |                      |   |             |                    |   |        |     |
| 9  | age__9                                                               | >15                                                                                                                         |                                                                                                                                                                                                                                                                                                                                                                                                                                                                                                                                                                                                |   |                         |                    |                                            |             |                              |   |                 |                        |           |             |                  |   |                |         |   |             |               |   |             |                      |   |             |                    |   |        |     |
| 25 | school_level                                                         | What school-level were the participants enrolled in?                                                                        | radio, Required<br><table border="1"> <tr><td>1</td><td>pre-K</td></tr> <tr><td>2</td><td>elementary</td></tr> <tr><td>3</td><td>junior high or middle school</td></tr> <tr><td>4</td><td>high school</td></tr> <tr><td>5</td><td>college +</td></tr> </table>                                                                                                                                                                                                                                                                                                                                 | 1 | pre-K                   | 2                  | elementary                                 | 3           | junior high or middle school | 4 | high school     | 5                      | college + |             |                  |   |                |         |   |             |               |   |             |                      |   |             |                    |   |        |     |
| 1  | pre-K                                                                |                                                                                                                             |                                                                                                                                                                                                                                                                                                                                                                                                                                                                                                                                                                                                |   |                         |                    |                                            |             |                              |   |                 |                        |           |             |                  |   |                |         |   |             |               |   |             |                      |   |             |                    |   |        |     |
| 2  | elementary                                                           |                                                                                                                             |                                                                                                                                                                                                                                                                                                                                                                                                                                                                                                                                                                                                |   |                         |                    |                                            |             |                              |   |                 |                        |           |             |                  |   |                |         |   |             |               |   |             |                      |   |             |                    |   |        |     |
| 3  | junior high or middle school                                         |                                                                                                                             |                                                                                                                                                                                                                                                                                                                                                                                                                                                                                                                                                                                                |   |                         |                    |                                            |             |                              |   |                 |                        |           |             |                  |   |                |         |   |             |               |   |             |                      |   |             |                    |   |        |     |
| 4  | high school                                                          |                                                                                                                             |                                                                                                                                                                                                                                                                                                                                                                                                                                                                                                                                                                                                |   |                         |                    |                                            |             |                              |   |                 |                        |           |             |                  |   |                |         |   |             |               |   |             |                      |   |             |                    |   |        |     |
| 5  | college +                                                            |                                                                                                                             |                                                                                                                                                                                                                                                                                                                                                                                                                                                                                                                                                                                                |   |                         |                    |                                            |             |                              |   |                 |                        |           |             |                  |   |                |         |   |             |               |   |             |                      |   |             |                    |   |        |     |
| 26 | sex                                                                  | What sexes were represented in the samples?                                                                                 | checkbox, Required<br><table border="1"> <tr><td>1</td><td>sex__1</td><td>Male</td></tr> <tr><td>2</td><td>sex__2</td><td>Female</td></tr> <tr><td>3</td><td>sex__3</td><td>Unidentified</td></tr> </table>                                                                                                                                                                                                                                                                                                                                                                                    | 1 | sex__1                  | Male               | 2                                          | sex__2      | Female                       | 3 | sex__3          | Unidentified           |           |             |                  |   |                |         |   |             |               |   |             |                      |   |             |                    |   |        |     |
| 1  | sex__1                                                               | Male                                                                                                                        |                                                                                                                                                                                                                                                                                                                                                                                                                                                                                                                                                                                                |   |                         |                    |                                            |             |                              |   |                 |                        |           |             |                  |   |                |         |   |             |               |   |             |                      |   |             |                    |   |        |     |
| 2  | sex__2                                                               | Female                                                                                                                      |                                                                                                                                                                                                                                                                                                                                                                                                                                                                                                                                                                                                |   |                         |                    |                                            |             |                              |   |                 |                        |           |             |                  |   |                |         |   |             |               |   |             |                      |   |             |                    |   |        |     |
| 3  | sex__3                                                               | Unidentified                                                                                                                |                                                                                                                                                                                                                                                                                                                                                                                                                                                                                                                                                                                                |   |                         |                    |                                            |             |                              |   |                 |                        |           |             |                  |   |                |         |   |             |               |   |             |                      |   |             |                    |   |        |     |
| 27 | sex2<br>Show the field ONLY if:<br>[sex(1)] = '1' and [sex(2)] = '1' | Were the sexes equally represented in the sample?<br><i>describe percentage of each sex or other as identified in study</i> | text, Required                                                                                                                                                                                                                                                                                                                                                                                                                                                                                                                                                                                 |   |                         |                    |                                            |             |                              |   |                 |                        |           |             |                  |   |                |         |   |             |               |   |             |                      |   |             |                    |   |        |     |

|                                                                                |                                                                                                                        |                                                                                                                                                                     |                                                                                                                                                                                                                                                                                                                                                                                                                                                                                                                                                                                                                       |   |                         |                       |                          |                       |                         |   |                       |                 |                             |                       |                          |   |                       |                 |   |                   |       |   |                   |             |   |                   |                 |
|--------------------------------------------------------------------------------|------------------------------------------------------------------------------------------------------------------------|---------------------------------------------------------------------------------------------------------------------------------------------------------------------|-----------------------------------------------------------------------------------------------------------------------------------------------------------------------------------------------------------------------------------------------------------------------------------------------------------------------------------------------------------------------------------------------------------------------------------------------------------------------------------------------------------------------------------------------------------------------------------------------------------------------|---|-------------------------|-----------------------|--------------------------|-----------------------|-------------------------|---|-----------------------|-----------------|-----------------------------|-----------------------|--------------------------|---|-----------------------|-----------------|---|-------------------|-------|---|-------------------|-------------|---|-------------------|-----------------|
| 28                                                                             | race_ethnicity                                                                                                         | Which races/ethnicities were represented in the sample?                                                                                                             | checkbox, Required<br><table border="1"> <tr><td>1</td><td>race_ethnicity__1</td><td>Caucasian</td></tr> <tr><td>2</td><td>race_ethnicity__2</td><td>African American/black</td></tr> <tr><td>3</td><td>race_ethnicity__3</td><td>Hispanic/Latino</td></tr> <tr><td>4</td><td>race_ethnicity__4</td><td>Pacific Islander</td></tr> <tr><td>5</td><td>race_ethnicity__5</td><td>Native American</td></tr> <tr><td>6</td><td>race_ethnicity__6</td><td>Asian</td></tr> <tr><td>7</td><td>race_ethnicity__7</td><td>Multiracial</td></tr> <tr><td>8</td><td>race_ethnicity__8</td><td>Unknown/unclear</td></tr> </table> | 1 | race_ethnicity__1       | Caucasian             | 2                        | race_ethnicity__2     | African American/black  | 3 | race_ethnicity__3     | Hispanic/Latino | 4                           | race_ethnicity__4     | Pacific Islander         | 5 | race_ethnicity__5     | Native American | 6 | race_ethnicity__6 | Asian | 7 | race_ethnicity__7 | Multiracial | 8 | race_ethnicity__8 | Unknown/unclear |
| 1                                                                              | race_ethnicity__1                                                                                                      | Caucasian                                                                                                                                                           |                                                                                                                                                                                                                                                                                                                                                                                                                                                                                                                                                                                                                       |   |                         |                       |                          |                       |                         |   |                       |                 |                             |                       |                          |   |                       |                 |   |                   |       |   |                   |             |   |                   |                 |
| 2                                                                              | race_ethnicity__2                                                                                                      | African American/black                                                                                                                                              |                                                                                                                                                                                                                                                                                                                                                                                                                                                                                                                                                                                                                       |   |                         |                       |                          |                       |                         |   |                       |                 |                             |                       |                          |   |                       |                 |   |                   |       |   |                   |             |   |                   |                 |
| 3                                                                              | race_ethnicity__3                                                                                                      | Hispanic/Latino                                                                                                                                                     |                                                                                                                                                                                                                                                                                                                                                                                                                                                                                                                                                                                                                       |   |                         |                       |                          |                       |                         |   |                       |                 |                             |                       |                          |   |                       |                 |   |                   |       |   |                   |             |   |                   |                 |
| 4                                                                              | race_ethnicity__4                                                                                                      | Pacific Islander                                                                                                                                                    |                                                                                                                                                                                                                                                                                                                                                                                                                                                                                                                                                                                                                       |   |                         |                       |                          |                       |                         |   |                       |                 |                             |                       |                          |   |                       |                 |   |                   |       |   |                   |             |   |                   |                 |
| 5                                                                              | race_ethnicity__5                                                                                                      | Native American                                                                                                                                                     |                                                                                                                                                                                                                                                                                                                                                                                                                                                                                                                                                                                                                       |   |                         |                       |                          |                       |                         |   |                       |                 |                             |                       |                          |   |                       |                 |   |                   |       |   |                   |             |   |                   |                 |
| 6                                                                              | race_ethnicity__6                                                                                                      | Asian                                                                                                                                                               |                                                                                                                                                                                                                                                                                                                                                                                                                                                                                                                                                                                                                       |   |                         |                       |                          |                       |                         |   |                       |                 |                             |                       |                          |   |                       |                 |   |                   |       |   |                   |             |   |                   |                 |
| 7                                                                              | race_ethnicity__7                                                                                                      | Multiracial                                                                                                                                                         |                                                                                                                                                                                                                                                                                                                                                                                                                                                                                                                                                                                                                       |   |                         |                       |                          |                       |                         |   |                       |                 |                             |                       |                          |   |                       |                 |   |                   |       |   |                   |             |   |                   |                 |
| 8                                                                              | race_ethnicity__8                                                                                                      | Unknown/unclear                                                                                                                                                     |                                                                                                                                                                                                                                                                                                                                                                                                                                                                                                                                                                                                                       |   |                         |                       |                          |                       |                         |   |                       |                 |                             |                       |                          |   |                       |                 |   |                   |       |   |                   |             |   |                   |                 |
| 29                                                                             | participant_characteristics_complete                                                                                   | Section Header: <i>Form Status</i><br>Complete?                                                                                                                     | dropdown<br><table border="1"> <tr><td>0</td><td>Incomplete</td></tr> <tr><td>1</td><td>Unverified</td></tr> <tr><td>2</td><td>Complete</td></tr> </table>                                                                                                                                                                                                                                                                                                                                                                                                                                                            | 0 | Incomplete              | 1                     | Unverified               | 2                     | Complete                |   |                       |                 |                             |                       |                          |   |                       |                 |   |                   |       |   |                   |             |   |                   |                 |
| 0                                                                              | Incomplete                                                                                                             |                                                                                                                                                                     |                                                                                                                                                                                                                                                                                                                                                                                                                                                                                                                                                                                                                       |   |                         |                       |                          |                       |                         |   |                       |                 |                             |                       |                          |   |                       |                 |   |                   |       |   |                   |             |   |                   |                 |
| 1                                                                              | Unverified                                                                                                             |                                                                                                                                                                     |                                                                                                                                                                                                                                                                                                                                                                                                                                                                                                                                                                                                                       |   |                         |                       |                          |                       |                         |   |                       |                 |                             |                       |                          |   |                       |                 |   |                   |       |   |                   |             |   |                   |                 |
| 2                                                                              | Complete                                                                                                               |                                                                                                                                                                     |                                                                                                                                                                                                                                                                                                                                                                                                                                                                                                                                                                                                                       |   |                         |                       |                          |                       |                         |   |                       |                 |                             |                       |                          |   |                       |                 |   |                   |       |   |                   |             |   |                   |                 |
| Instrument: <b>Intervention Characteristics</b> (intervention_characteristics) |                                                                                                                        |                                                                                                                                                                     | <a href="#">^ Collapse</a>                                                                                                                                                                                                                                                                                                                                                                                                                                                                                                                                                                                            |   |                         |                       |                          |                       |                         |   |                       |                 |                             |                       |                          |   |                       |                 |   |                   |       |   |                   |             |   |                   |                 |
| 30                                                                             | interventionname                                                                                                       | Name of intervention                                                                                                                                                | text, Required                                                                                                                                                                                                                                                                                                                                                                                                                                                                                                                                                                                                        |   |                         |                       |                          |                       |                         |   |                       |                 |                             |                       |                          |   |                       |                 |   |                   |       |   |                   |             |   |                   |                 |
| 31                                                                             | interventiondescription                                                                                                | Brief description of intervention                                                                                                                                   | text, Required                                                                                                                                                                                                                                                                                                                                                                                                                                                                                                                                                                                                        |   |                         |                       |                          |                       |                         |   |                       |                 |                             |                       |                          |   |                       |                 |   |                   |       |   |                   |             |   |                   |                 |
| 32                                                                             | intervention_focus                                                                                                     | Which of the following characteristics were a focus of the discourse intervention?                                                                                  | checkbox<br><table border="1"> <tr><td>1</td><td>intervention_focus__1</td><td>reading comprehension</td></tr> <tr><td>2</td><td>intervention_focus__2</td><td>listening comprehension</td></tr> <tr><td>3</td><td>intervention_focus__3</td><td>oral production</td></tr> <tr><td>4</td><td>intervention_focus__4</td><td>written production</td></tr> <tr><td>5</td><td>intervention_focus__5</td><td>unknown</td></tr> </table>                                                                                                                                                                                    | 1 | intervention_focus__1   | reading comprehension | 2                        | intervention_focus__2 | listening comprehension | 3 | intervention_focus__3 | oral production | 4                           | intervention_focus__4 | written production       | 5 | intervention_focus__5 | unknown         |   |                   |       |   |                   |             |   |                   |                 |
| 1                                                                              | intervention_focus__1                                                                                                  | reading comprehension                                                                                                                                               |                                                                                                                                                                                                                                                                                                                                                                                                                                                                                                                                                                                                                       |   |                         |                       |                          |                       |                         |   |                       |                 |                             |                       |                          |   |                       |                 |   |                   |       |   |                   |             |   |                   |                 |
| 2                                                                              | intervention_focus__2                                                                                                  | listening comprehension                                                                                                                                             |                                                                                                                                                                                                                                                                                                                                                                                                                                                                                                                                                                                                                       |   |                         |                       |                          |                       |                         |   |                       |                 |                             |                       |                          |   |                       |                 |   |                   |       |   |                   |             |   |                   |                 |
| 3                                                                              | intervention_focus__3                                                                                                  | oral production                                                                                                                                                     |                                                                                                                                                                                                                                                                                                                                                                                                                                                                                                                                                                                                                       |   |                         |                       |                          |                       |                         |   |                       |                 |                             |                       |                          |   |                       |                 |   |                   |       |   |                   |             |   |                   |                 |
| 4                                                                              | intervention_focus__4                                                                                                  | written production                                                                                                                                                  |                                                                                                                                                                                                                                                                                                                                                                                                                                                                                                                                                                                                                       |   |                         |                       |                          |                       |                         |   |                       |                 |                             |                       |                          |   |                       |                 |   |                   |       |   |                   |             |   |                   |                 |
| 5                                                                              | intervention_focus__5                                                                                                  | unknown                                                                                                                                                             |                                                                                                                                                                                                                                                                                                                                                                                                                                                                                                                                                                                                                       |   |                         |                       |                          |                       |                         |   |                       |                 |                             |                       |                          |   |                       |                 |   |                   |       |   |                   |             |   |                   |                 |
| 33                                                                             | discourse_type                                                                                                         | Which discourse genre is targeted in the intervention?                                                                                                              | checkbox, Required<br><table border="1"> <tr><td>1</td><td>discourse_type__1</td><td>narrative</td></tr> <tr><td>2</td><td>discourse_type__2</td><td>expository</td></tr> <tr><td>3</td><td>discourse_type__3</td><td>unknown</td></tr> <tr><td>4</td><td>discourse_type__4</td><td>other</td></tr> </table>                                                                                                                                                                                                                                                                                                          | 1 | discourse_type__1       | narrative             | 2                        | discourse_type__2     | expository              | 3 | discourse_type__3     | unknown         | 4                           | discourse_type__4     | other                    |   |                       |                 |   |                   |       |   |                   |             |   |                   |                 |
| 1                                                                              | discourse_type__1                                                                                                      | narrative                                                                                                                                                           |                                                                                                                                                                                                                                                                                                                                                                                                                                                                                                                                                                                                                       |   |                         |                       |                          |                       |                         |   |                       |                 |                             |                       |                          |   |                       |                 |   |                   |       |   |                   |             |   |                   |                 |
| 2                                                                              | discourse_type__2                                                                                                      | expository                                                                                                                                                          |                                                                                                                                                                                                                                                                                                                                                                                                                                                                                                                                                                                                                       |   |                         |                       |                          |                       |                         |   |                       |                 |                             |                       |                          |   |                       |                 |   |                   |       |   |                   |             |   |                   |                 |
| 3                                                                              | discourse_type__3                                                                                                      | unknown                                                                                                                                                             |                                                                                                                                                                                                                                                                                                                                                                                                                                                                                                                                                                                                                       |   |                         |                       |                          |                       |                         |   |                       |                 |                             |                       |                          |   |                       |                 |   |                   |       |   |                   |             |   |                   |                 |
| 4                                                                              | discourse_type__4                                                                                                      | other                                                                                                                                                               |                                                                                                                                                                                                                                                                                                                                                                                                                                                                                                                                                                                                                       |   |                         |                       |                          |                       |                         |   |                       |                 |                             |                       |                          |   |                       |                 |   |                   |       |   |                   |             |   |                   |                 |
| 34                                                                             | intervention_goal<br><small>Show the field ONLY if:<br/>[discourse_type(1)] = '1' or [discourse_type(2)] = '1'</small> | What was the primary goal of the intervention?                                                                                                                      | radio<br><table border="1"> <tr><td>1</td><td>narrative comprehension</td></tr> <tr><td>2</td><td>expository comprehension</td></tr> <tr><td>3</td><td>narrative production</td></tr> <tr><td>4</td><td>expository production</td></tr> <tr><td>5</td><td>oral language comprehension</td></tr> <tr><td>6</td><td>oral language production</td></tr> </table>                                                                                                                                                                                                                                                         | 1 | narrative comprehension | 2                     | expository comprehension | 3                     | narrative production    | 4 | expository production | 5               | oral language comprehension | 6                     | oral language production |   |                       |                 |   |                   |       |   |                   |             |   |                   |                 |
| 1                                                                              | narrative comprehension                                                                                                |                                                                                                                                                                     |                                                                                                                                                                                                                                                                                                                                                                                                                                                                                                                                                                                                                       |   |                         |                       |                          |                       |                         |   |                       |                 |                             |                       |                          |   |                       |                 |   |                   |       |   |                   |             |   |                   |                 |
| 2                                                                              | expository comprehension                                                                                               |                                                                                                                                                                     |                                                                                                                                                                                                                                                                                                                                                                                                                                                                                                                                                                                                                       |   |                         |                       |                          |                       |                         |   |                       |                 |                             |                       |                          |   |                       |                 |   |                   |       |   |                   |             |   |                   |                 |
| 3                                                                              | narrative production                                                                                                   |                                                                                                                                                                     |                                                                                                                                                                                                                                                                                                                                                                                                                                                                                                                                                                                                                       |   |                         |                       |                          |                       |                         |   |                       |                 |                             |                       |                          |   |                       |                 |   |                   |       |   |                   |             |   |                   |                 |
| 4                                                                              | expository production                                                                                                  |                                                                                                                                                                     |                                                                                                                                                                                                                                                                                                                                                                                                                                                                                                                                                                                                                       |   |                         |                       |                          |                       |                         |   |                       |                 |                             |                       |                          |   |                       |                 |   |                   |       |   |                   |             |   |                   |                 |
| 5                                                                              | oral language comprehension                                                                                            |                                                                                                                                                                     |                                                                                                                                                                                                                                                                                                                                                                                                                                                                                                                                                                                                                       |   |                         |                       |                          |                       |                         |   |                       |                 |                             |                       |                          |   |                       |                 |   |                   |       |   |                   |             |   |                   |                 |
| 6                                                                              | oral language production                                                                                               |                                                                                                                                                                     |                                                                                                                                                                                                                                                                                                                                                                                                                                                                                                                                                                                                                       |   |                         |                       |                          |                       |                         |   |                       |                 |                             |                       |                          |   |                       |                 |   |                   |       |   |                   |             |   |                   |                 |
| 35                                                                             | intervention_length                                                                                                    | Total length of intervention and number of sessions? (e.g., 12 sessions over 4 weeks)<br><i>INCLUDE number of total sessions administered; weeks, months, years</i> | text, Required                                                                                                                                                                                                                                                                                                                                                                                                                                                                                                                                                                                                        |   |                         |                       |                          |                       |                         |   |                       |                 |                             |                       |                          |   |                       |                 |   |                   |       |   |                   |             |   |                   |                 |
| 36                                                                             | session_time                                                                                                           | How long was each intervention session?<br><i>minutes</i>                                                                                                           | text, Required                                                                                                                                                                                                                                                                                                                                                                                                                                                                                                                                                                                                        |   |                         |                       |                          |                       |                         |   |                       |                 |                             |                       |                          |   |                       |                 |   |                   |       |   |                   |             |   |                   |                 |
| 37                                                                             | session_type                                                                                                           | Type of session                                                                                                                                                     | radio, Required<br><table border="1"> <tr><td>1</td><td>one-on-one</td></tr> <tr><td>2</td><td>pairs or small group</td></tr> <tr><td>3</td><td>group</td></tr> <tr><td>4</td><td>whole class</td></tr> <tr><td>5</td><td>unknown/unclear</td></tr> </table>                                                                                                                                                                                                                                                                                                                                                          | 1 | one-on-one              | 2                     | pairs or small group     | 3                     | group                   | 4 | whole class           | 5               | unknown/unclear             |                       |                          |   |                       |                 |   |                   |       |   |                   |             |   |                   |                 |
| 1                                                                              | one-on-one                                                                                                             |                                                                                                                                                                     |                                                                                                                                                                                                                                                                                                                                                                                                                                                                                                                                                                                                                       |   |                         |                       |                          |                       |                         |   |                       |                 |                             |                       |                          |   |                       |                 |   |                   |       |   |                   |             |   |                   |                 |
| 2                                                                              | pairs or small group                                                                                                   |                                                                                                                                                                     |                                                                                                                                                                                                                                                                                                                                                                                                                                                                                                                                                                                                                       |   |                         |                       |                          |                       |                         |   |                       |                 |                             |                       |                          |   |                       |                 |   |                   |       |   |                   |             |   |                   |                 |
| 3                                                                              | group                                                                                                                  |                                                                                                                                                                     |                                                                                                                                                                                                                                                                                                                                                                                                                                                                                                                                                                                                                       |   |                         |                       |                          |                       |                         |   |                       |                 |                             |                       |                          |   |                       |                 |   |                   |       |   |                   |             |   |                   |                 |
| 4                                                                              | whole class                                                                                                            |                                                                                                                                                                     |                                                                                                                                                                                                                                                                                                                                                                                                                                                                                                                                                                                                                       |   |                         |                       |                          |                       |                         |   |                       |                 |                             |                       |                          |   |                       |                 |   |                   |       |   |                   |             |   |                   |                 |
| 5                                                                              | unknown/unclear                                                                                                        |                                                                                                                                                                     |                                                                                                                                                                                                                                                                                                                                                                                                                                                                                                                                                                                                                       |   |                         |                       |                          |                       |                         |   |                       |                 |                             |                       |                          |   |                       |                 |   |                   |       |   |                   |             |   |                   |                 |

|    |                                                                           |                                                                                                                                                                                   |                                                                                                                                                                                                                                                                                              |   |                   |   |                       |   |                               |   |                           |   |                   |   |         |
|----|---------------------------------------------------------------------------|-----------------------------------------------------------------------------------------------------------------------------------------------------------------------------------|----------------------------------------------------------------------------------------------------------------------------------------------------------------------------------------------------------------------------------------------------------------------------------------------|---|-------------------|---|-----------------------|---|-------------------------------|---|---------------------------|---|-------------------|---|---------|
| 38 | intervention_admin                                                        | Who administered the intervention?                                                                                                                                                | radio, Required<br><table border="1"> <tr><td>1</td><td>SLP</td></tr> <tr><td>2</td><td>researcher</td></tr> <tr><td>3</td><td>RA</td></tr> <tr><td>4</td><td>special education teacher</td></tr> <tr><td>5</td><td>classroom teacher</td></tr> <tr><td>6</td><td>unknown</td></tr> </table> | 1 | SLP               | 2 | researcher            | 3 | RA                            | 4 | special education teacher | 5 | classroom teacher | 6 | unknown |
| 1  | SLP                                                                       |                                                                                                                                                                                   |                                                                                                                                                                                                                                                                                              |   |                   |   |                       |   |                               |   |                           |   |                   |   |         |
| 2  | researcher                                                                |                                                                                                                                                                                   |                                                                                                                                                                                                                                                                                              |   |                   |   |                       |   |                               |   |                           |   |                   |   |         |
| 3  | RA                                                                        |                                                                                                                                                                                   |                                                                                                                                                                                                                                                                                              |   |                   |   |                       |   |                               |   |                           |   |                   |   |         |
| 4  | special education teacher                                                 |                                                                                                                                                                                   |                                                                                                                                                                                                                                                                                              |   |                   |   |                       |   |                               |   |                           |   |                   |   |         |
| 5  | classroom teacher                                                         |                                                                                                                                                                                   |                                                                                                                                                                                                                                                                                              |   |                   |   |                       |   |                               |   |                           |   |                   |   |         |
| 6  | unknown                                                                   |                                                                                                                                                                                   |                                                                                                                                                                                                                                                                                              |   |                   |   |                       |   |                               |   |                           |   |                   |   |         |
| 39 | progress_monitor                                                          | Was progress-monitoring used throughout the intervention?                                                                                                                         | radio, Required<br><table border="1"> <tr><td>1</td><td>Yes</td></tr> <tr><td>2</td><td>No</td></tr> <tr><td>3</td><td>Unknown</td></tr> </table>                                                                                                                                            | 1 | Yes               | 2 | No                    | 3 | Unknown                       |   |                           |   |                   |   |         |
| 1  | Yes                                                                       |                                                                                                                                                                                   |                                                                                                                                                                                                                                                                                              |   |                   |   |                       |   |                               |   |                           |   |                   |   |         |
| 2  | No                                                                        |                                                                                                                                                                                   |                                                                                                                                                                                                                                                                                              |   |                   |   |                       |   |                               |   |                           |   |                   |   |         |
| 3  | Unknown                                                                   |                                                                                                                                                                                   |                                                                                                                                                                                                                                                                                              |   |                   |   |                       |   |                               |   |                           |   |                   |   |         |
| 40 | progress_monitor_2<br>Show the field ONLY if:<br>[progress_monitor] = '1' | What type of progress monitoring tool was used?                                                                                                                                   | radio, Required<br><table border="1"> <tr><td>1</td><td>standardized</td></tr> <tr><td>2</td><td>informal</td></tr> <tr><td>3</td><td>researcher-developed protocol</td></tr> <tr><td>4</td><td>probe</td></tr> <tr><td>5</td><td>other</td></tr> </table>                                   | 1 | standardized      | 2 | informal              | 3 | researcher-developed protocol | 4 | probe                     | 5 | other             |   |         |
| 1  | standardized                                                              |                                                                                                                                                                                   |                                                                                                                                                                                                                                                                                              |   |                   |   |                       |   |                               |   |                           |   |                   |   |         |
| 2  | informal                                                                  |                                                                                                                                                                                   |                                                                                                                                                                                                                                                                                              |   |                   |   |                       |   |                               |   |                           |   |                   |   |         |
| 3  | researcher-developed protocol                                             |                                                                                                                                                                                   |                                                                                                                                                                                                                                                                                              |   |                   |   |                       |   |                               |   |                           |   |                   |   |         |
| 4  | probe                                                                     |                                                                                                                                                                                   |                                                                                                                                                                                                                                                                                              |   |                   |   |                       |   |                               |   |                           |   |                   |   |         |
| 5  | other                                                                     |                                                                                                                                                                                   |                                                                                                                                                                                                                                                                                              |   |                   |   |                       |   |                               |   |                           |   |                   |   |         |
| 41 | fidelity                                                                  | Were fidelity measures used?                                                                                                                                                      | radio, Required<br><table border="1"> <tr><td>1</td><td>Yes</td></tr> <tr><td>2</td><td>No</td></tr> <tr><td>3</td><td>Unknown</td></tr> </table>                                                                                                                                            | 1 | Yes               | 2 | No                    | 3 | Unknown                       |   |                           |   |                   |   |         |
| 1  | Yes                                                                       |                                                                                                                                                                                   |                                                                                                                                                                                                                                                                                              |   |                   |   |                       |   |                               |   |                           |   |                   |   |         |
| 2  | No                                                                        |                                                                                                                                                                                   |                                                                                                                                                                                                                                                                                              |   |                   |   |                       |   |                               |   |                           |   |                   |   |         |
| 3  | Unknown                                                                   |                                                                                                                                                                                   |                                                                                                                                                                                                                                                                                              |   |                   |   |                       |   |                               |   |                           |   |                   |   |         |
| 42 | fidelity_percentage<br>Show the field ONLY if:<br>[fidelity] = '1'        | What percentage of fidelity was reached?                                                                                                                                          | text, Required                                                                                                                                                                                                                                                                               |   |                   |   |                       |   |                               |   |                           |   |                   |   |         |
| 43 | intervention_group                                                        | Was there evidence that the intervention group might have also experienced a changed expectancy, novelty and/or disruption effect that the control group did not also experience? | radio, Required<br><table border="1"> <tr><td>1</td><td>Yes</td></tr> <tr><td>2</td><td>No</td></tr> <tr><td>3</td><td>Unknown</td></tr> </table>                                                                                                                                            | 1 | Yes               | 2 | No                    | 3 | Unknown                       |   |                           |   |                   |   |         |
| 1  | Yes                                                                       |                                                                                                                                                                                   |                                                                                                                                                                                                                                                                                              |   |                   |   |                       |   |                               |   |                           |   |                   |   |         |
| 2  | No                                                                        |                                                                                                                                                                                   |                                                                                                                                                                                                                                                                                              |   |                   |   |                       |   |                               |   |                           |   |                   |   |         |
| 3  | Unknown                                                                   |                                                                                                                                                                                   |                                                                                                                                                                                                                                                                                              |   |                   |   |                       |   |                               |   |                           |   |                   |   |         |
| 44 | control_yes_no                                                            | Was a control/comparison group included?                                                                                                                                          | radio, Required<br><table border="1"> <tr><td>1</td><td>Yes</td></tr> <tr><td>2</td><td>No</td></tr> <tr><td>3</td><td>Unknown</td></tr> </table>                                                                                                                                            | 1 | Yes               | 2 | No                    | 3 | Unknown                       |   |                           |   |                   |   |         |
| 1  | Yes                                                                       |                                                                                                                                                                                   |                                                                                                                                                                                                                                                                                              |   |                   |   |                       |   |                               |   |                           |   |                   |   |         |
| 2  | No                                                                        |                                                                                                                                                                                   |                                                                                                                                                                                                                                                                                              |   |                   |   |                       |   |                               |   |                           |   |                   |   |         |
| 3  | Unknown                                                                   |                                                                                                                                                                                   |                                                                                                                                                                                                                                                                                              |   |                   |   |                       |   |                               |   |                           |   |                   |   |         |
| 45 | control_tx<br>Show the field ONLY if:<br>[control_yes_no] = '1'           | How were control groups treated?                                                                                                                                                  | radio, Required<br><table border="1"> <tr><td>1</td><td>business-as-usual</td></tr> <tr><td>2</td><td>compensating activity</td></tr> <tr><td>3</td><td>alternative intervention</td></tr> <tr><td>4</td><td>delayed intervention</td></tr> </table>                                         | 1 | business-as-usual | 2 | compensating activity | 3 | alternative intervention      | 4 | delayed intervention      |   |                   |   |         |
| 1  | business-as-usual                                                         |                                                                                                                                                                                   |                                                                                                                                                                                                                                                                                              |   |                   |   |                       |   |                               |   |                           |   |                   |   |         |
| 2  | compensating activity                                                     |                                                                                                                                                                                   |                                                                                                                                                                                                                                                                                              |   |                   |   |                       |   |                               |   |                           |   |                   |   |         |
| 3  | alternative intervention                                                  |                                                                                                                                                                                   |                                                                                                                                                                                                                                                                                              |   |                   |   |                       |   |                               |   |                           |   |                   |   |         |
| 4  | delayed intervention                                                      |                                                                                                                                                                                   |                                                                                                                                                                                                                                                                                              |   |                   |   |                       |   |                               |   |                           |   |                   |   |         |
| 46 | school<br>Show the field ONLY if:<br>[control_yes_no] = '1'               | Were intervention and control groups drawn from the same school?                                                                                                                  | radio, Required<br><table border="1"> <tr><td>1</td><td>Yes</td></tr> <tr><td>2</td><td>No</td></tr> <tr><td>3</td><td>Unknown</td></tr> </table>                                                                                                                                            | 1 | Yes               | 2 | No                    | 3 | Unknown                       |   |                           |   |                   |   |         |
| 1  | Yes                                                                       |                                                                                                                                                                                   |                                                                                                                                                                                                                                                                                              |   |                   |   |                       |   |                               |   |                           |   |                   |   |         |
| 2  | No                                                                        |                                                                                                                                                                                   |                                                                                                                                                                                                                                                                                              |   |                   |   |                       |   |                               |   |                           |   |                   |   |         |
| 3  | Unknown                                                                   |                                                                                                                                                                                   |                                                                                                                                                                                                                                                                                              |   |                   |   |                       |   |                               |   |                           |   |                   |   |         |
| 47 | tx_classrooms<br>Show the field ONLY if:<br>[school] = '1'                | Were intervention and control groups drawn from the same grade?                                                                                                                   | radio, Required<br><table border="1"> <tr><td>1</td><td>Yes</td></tr> <tr><td>2</td><td>No</td></tr> <tr><td>3</td><td>Unknown</td></tr> </table>                                                                                                                                            | 1 | Yes               | 2 | No                    | 3 | Unknown                       |   |                           |   |                   |   |         |
| 1  | Yes                                                                       |                                                                                                                                                                                   |                                                                                                                                                                                                                                                                                              |   |                   |   |                       |   |                               |   |                           |   |                   |   |         |
| 2  | No                                                                        |                                                                                                                                                                                   |                                                                                                                                                                                                                                                                                              |   |                   |   |                       |   |                               |   |                           |   |                   |   |         |
| 3  | Unknown                                                                   |                                                                                                                                                                                   |                                                                                                                                                                                                                                                                                              |   |                   |   |                       |   |                               |   |                           |   |                   |   |         |

|                                                                                                                    |                                                                         |                                                                                                                            |                                                                                                                                                                                                                                                                                     |
|--------------------------------------------------------------------------------------------------------------------|-------------------------------------------------------------------------|----------------------------------------------------------------------------------------------------------------------------|-------------------------------------------------------------------------------------------------------------------------------------------------------------------------------------------------------------------------------------------------------------------------------------|
| 48                                                                                                                 | blinded1<br>Show the field ONLY if:<br>[tx_classrooms] = '1'            | Did participants, parents or teacher know who was in which condition?                                                      | radio, Required<br>1 Yes<br>2 No<br>3 Unknown                                                                                                                                                                                                                                       |
| 49                                                                                                                 | intervention_characteristics_complete                                   | Section Header: <i>Form Status</i><br>Complete?                                                                            | dropdown<br>0 Incomplete<br>1 Unverified<br>2 Complete                                                                                                                                                                                                                              |
| Instrument: <b>Setting Characteristics</b> (setting_characteristics) <span style="float: right;">^ Collapse</span> |                                                                         |                                                                                                                            |                                                                                                                                                                                                                                                                                     |
| 50                                                                                                                 | location                                                                | Where were participants? (e.g., USA, Denmark)                                                                              | text, Required                                                                                                                                                                                                                                                                      |
| 51                                                                                                                 | location2                                                               | If in United States, what states was the study conducted in? (use state abbreviations or geographic area like "southwest") | text, Required                                                                                                                                                                                                                                                                      |
| 52                                                                                                                 | location3                                                               | What type of community was the study conducted in?                                                                         | radio, Required<br>1 urban<br>2 suburban<br>3 inner-city<br>4 rural<br>5 unknown                                                                                                                                                                                                    |
| 53                                                                                                                 | school_setting1                                                         | Was the intervention completed in a school setting?                                                                        | radio, Required<br>1 Yes<br>2 No<br>3 Unclear/unknown                                                                                                                                                                                                                               |
| 54                                                                                                                 | school_setting_2<br>Show the field ONLY if:<br>[school_setting1] = '1'  | What type of school(s) was the study conducted in?                                                                         | radio, Required<br>1 public school<br>2 private school (secular)<br>3 private school (non-secular)<br>4 charter school<br>5 Montessori<br>6 unknown                                                                                                                                 |
| 55                                                                                                                 | setting2<br>Show the field ONLY if:<br>[school_setting1] = '2'          | In what setting was intervention completed?                                                                                | radio, Required<br>1 university lab<br>2 clinic (university)<br>3 clinic (private)<br>4 home<br>5 mixed location<br>6 unknown/unclear                                                                                                                                               |
| 56                                                                                                                 | classroom_setting<br>Show the field ONLY if:<br>[school_setting1] = '1' | What classroom types were represented among the settings?                                                                  | checkbox, Required<br>1 classroom_setting__1 regular education classroom<br>2 classroom_setting__2 special education classroom<br>3 classroom_setting__3 speech-language pathologist office<br>4 classroom_setting__4 small-group setting<br>5 classroom_setting__5 unknown/unclear |

|                                                                                                    |                                                                     |                                                                                                                   |                                                                                                                                                                                                                                                                                                                                                                                                                                                                                                                                                                                                                                                       |   |                     |                         |            |                     |                       |   |                     |                 |   |                     |                    |   |                     |                            |   |                     |                     |   |                    |                   |   |                    |         |
|----------------------------------------------------------------------------------------------------|---------------------------------------------------------------------|-------------------------------------------------------------------------------------------------------------------|-------------------------------------------------------------------------------------------------------------------------------------------------------------------------------------------------------------------------------------------------------------------------------------------------------------------------------------------------------------------------------------------------------------------------------------------------------------------------------------------------------------------------------------------------------------------------------------------------------------------------------------------------------|---|---------------------|-------------------------|------------|---------------------|-----------------------|---|---------------------|-----------------|---|---------------------|--------------------|---|---------------------|----------------------------|---|---------------------|---------------------|---|--------------------|-------------------|---|--------------------|---------|
| 57                                                                                                 | setting_characteristics_complete                                    | Section Header: <i>Form Status</i><br>Complete?                                                                   | dropdown<br><table border="1"> <tr><td>0</td><td>Incomplete</td></tr> <tr><td>1</td><td>Unverified</td></tr> <tr><td>2</td><td>Complete</td></tr> </table>                                                                                                                                                                                                                                                                                                                                                                                                                                                                                            | 0 | Incomplete          | 1                       | Unverified | 2                   | Complete              |   |                     |                 |   |                     |                    |   |                     |                            |   |                     |                     |   |                    |                   |   |                    |         |
| 0                                                                                                  | Incomplete                                                          |                                                                                                                   |                                                                                                                                                                                                                                                                                                                                                                                                                                                                                                                                                                                                                                                       |   |                     |                         |            |                     |                       |   |                     |                 |   |                     |                    |   |                     |                            |   |                     |                     |   |                    |                   |   |                    |         |
| 1                                                                                                  | Unverified                                                          |                                                                                                                   |                                                                                                                                                                                                                                                                                                                                                                                                                                                                                                                                                                                                                                                       |   |                     |                         |            |                     |                       |   |                     |                 |   |                     |                    |   |                     |                            |   |                     |                     |   |                    |                   |   |                    |         |
| 2                                                                                                  | Complete                                                            |                                                                                                                   |                                                                                                                                                                                                                                                                                                                                                                                                                                                                                                                                                                                                                                                       |   |                     |                         |            |                     |                       |   |                     |                 |   |                     |                    |   |                     |                            |   |                     |                     |   |                    |                   |   |                    |         |
| Instrument: <b>Outcome Measure</b> (outcome_measure) <span style="float: right;">^ Collapse</span> |                                                                     |                                                                                                                   |                                                                                                                                                                                                                                                                                                                                                                                                                                                                                                                                                                                                                                                       |   |                     |                         |            |                     |                       |   |                     |                 |   |                     |                    |   |                     |                            |   |                     |                     |   |                    |                   |   |                    |         |
| 58                                                                                                 | outcome_measure                                                     | What aspect of language did this outcome measure?                                                                 | checkbox, Required<br><table border="1"> <tr><td>1</td><td>outcome_measure__1</td><td>listening comprehension</td></tr> <tr><td>2</td><td>outcome_measure__2</td><td>reading comprehension</td></tr> <tr><td>3</td><td>outcome_measure__3</td><td>oral production</td></tr> <tr><td>4</td><td>outcome_measure__4</td><td>written production</td></tr> <tr><td>5</td><td>outcome_measure__5</td><td>discourse quality</td></tr> <tr><td>6</td><td>outcome_measure__6</td><td>working memory</td></tr> <tr><td>7</td><td>outcome_measure__7</td><td>online processing</td></tr> <tr><td>8</td><td>outcome_measure__8</td><td>unknown</td></tr> </table> | 1 | outcome_measure__1  | listening comprehension | 2          | outcome_measure__2  | reading comprehension | 3 | outcome_measure__3  | oral production | 4 | outcome_measure__4  | written production | 5 | outcome_measure__5  | discourse quality          | 6 | outcome_measure__6  | working memory      | 7 | outcome_measure__7 | online processing | 8 | outcome_measure__8 | unknown |
| 1                                                                                                  | outcome_measure__1                                                  | listening comprehension                                                                                           |                                                                                                                                                                                                                                                                                                                                                                                                                                                                                                                                                                                                                                                       |   |                     |                         |            |                     |                       |   |                     |                 |   |                     |                    |   |                     |                            |   |                     |                     |   |                    |                   |   |                    |         |
| 2                                                                                                  | outcome_measure__2                                                  | reading comprehension                                                                                             |                                                                                                                                                                                                                                                                                                                                                                                                                                                                                                                                                                                                                                                       |   |                     |                         |            |                     |                       |   |                     |                 |   |                     |                    |   |                     |                            |   |                     |                     |   |                    |                   |   |                    |         |
| 3                                                                                                  | outcome_measure__3                                                  | oral production                                                                                                   |                                                                                                                                                                                                                                                                                                                                                                                                                                                                                                                                                                                                                                                       |   |                     |                         |            |                     |                       |   |                     |                 |   |                     |                    |   |                     |                            |   |                     |                     |   |                    |                   |   |                    |         |
| 4                                                                                                  | outcome_measure__4                                                  | written production                                                                                                |                                                                                                                                                                                                                                                                                                                                                                                                                                                                                                                                                                                                                                                       |   |                     |                         |            |                     |                       |   |                     |                 |   |                     |                    |   |                     |                            |   |                     |                     |   |                    |                   |   |                    |         |
| 5                                                                                                  | outcome_measure__5                                                  | discourse quality                                                                                                 |                                                                                                                                                                                                                                                                                                                                                                                                                                                                                                                                                                                                                                                       |   |                     |                         |            |                     |                       |   |                     |                 |   |                     |                    |   |                     |                            |   |                     |                     |   |                    |                   |   |                    |         |
| 6                                                                                                  | outcome_measure__6                                                  | working memory                                                                                                    |                                                                                                                                                                                                                                                                                                                                                                                                                                                                                                                                                                                                                                                       |   |                     |                         |            |                     |                       |   |                     |                 |   |                     |                    |   |                     |                            |   |                     |                     |   |                    |                   |   |                    |         |
| 7                                                                                                  | outcome_measure__7                                                  | online processing                                                                                                 |                                                                                                                                                                                                                                                                                                                                                                                                                                                                                                                                                                                                                                                       |   |                     |                         |            |                     |                       |   |                     |                 |   |                     |                    |   |                     |                            |   |                     |                     |   |                    |                   |   |                    |         |
| 8                                                                                                  | outcome_measure__8                                                  | unknown                                                                                                           |                                                                                                                                                                                                                                                                                                                                                                                                                                                                                                                                                                                                                                                       |   |                     |                         |            |                     |                       |   |                     |                 |   |                     |                    |   |                     |                            |   |                     |                     |   |                    |                   |   |                    |         |
| 59                                                                                                 | outcome_measure2                                                    | What types of outcome measure were included?                                                                      | checkbox<br><table border="1"> <tr><td>1</td><td>outcome_measure2__1</td><td>norm-referenced</td></tr> <tr><td>2</td><td>outcome_measure2__2</td><td>checklist</td></tr> <tr><td>3</td><td>outcome_measure2__3</td><td>rubric-based</td></tr> <tr><td>4</td><td>outcome_measure2__4</td><td>class grades</td></tr> <tr><td>5</td><td>outcome_measure2__5</td><td>overall performance rating</td></tr> <tr><td>6</td><td>outcome_measure2__6</td><td>progress monitoring</td></tr> </table>                                                                                                                                                            | 1 | outcome_measure2__1 | norm-referenced         | 2          | outcome_measure2__2 | checklist             | 3 | outcome_measure2__3 | rubric-based    | 4 | outcome_measure2__4 | class grades       | 5 | outcome_measure2__5 | overall performance rating | 6 | outcome_measure2__6 | progress monitoring |   |                    |                   |   |                    |         |
| 1                                                                                                  | outcome_measure2__1                                                 | norm-referenced                                                                                                   |                                                                                                                                                                                                                                                                                                                                                                                                                                                                                                                                                                                                                                                       |   |                     |                         |            |                     |                       |   |                     |                 |   |                     |                    |   |                     |                            |   |                     |                     |   |                    |                   |   |                    |         |
| 2                                                                                                  | outcome_measure2__2                                                 | checklist                                                                                                         |                                                                                                                                                                                                                                                                                                                                                                                                                                                                                                                                                                                                                                                       |   |                     |                         |            |                     |                       |   |                     |                 |   |                     |                    |   |                     |                            |   |                     |                     |   |                    |                   |   |                    |         |
| 3                                                                                                  | outcome_measure2__3                                                 | rubric-based                                                                                                      |                                                                                                                                                                                                                                                                                                                                                                                                                                                                                                                                                                                                                                                       |   |                     |                         |            |                     |                       |   |                     |                 |   |                     |                    |   |                     |                            |   |                     |                     |   |                    |                   |   |                    |         |
| 4                                                                                                  | outcome_measure2__4                                                 | class grades                                                                                                      |                                                                                                                                                                                                                                                                                                                                                                                                                                                                                                                                                                                                                                                       |   |                     |                         |            |                     |                       |   |                     |                 |   |                     |                    |   |                     |                            |   |                     |                     |   |                    |                   |   |                    |         |
| 5                                                                                                  | outcome_measure2__5                                                 | overall performance rating                                                                                        |                                                                                                                                                                                                                                                                                                                                                                                                                                                                                                                                                                                                                                                       |   |                     |                         |            |                     |                       |   |                     |                 |   |                     |                    |   |                     |                            |   |                     |                     |   |                    |                   |   |                    |         |
| 6                                                                                                  | outcome_measure2__6                                                 | progress monitoring                                                                                               |                                                                                                                                                                                                                                                                                                                                                                                                                                                                                                                                                                                                                                                       |   |                     |                         |            |                     |                       |   |                     |                 |   |                     |                    |   |                     |                            |   |                     |                     |   |                    |                   |   |                    |         |
| 60                                                                                                 | outcomevalidity                                                     | Has the assessment tool been previously shown to be both reliable and valid?                                      | radio, Required<br><table border="1"> <tr><td>1</td><td>Yes</td></tr> <tr><td>2</td><td>No</td></tr> <tr><td>3</td><td>Unknown</td></tr> </table>                                                                                                                                                                                                                                                                                                                                                                                                                                                                                                     | 1 | Yes                 | 2                       | No         | 3                   | Unknown               |   |                     |                 |   |                     |                    |   |                     |                            |   |                     |                     |   |                    |                   |   |                    |         |
| 1                                                                                                  | Yes                                                                 |                                                                                                                   |                                                                                                                                                                                                                                                                                                                                                                                                                                                                                                                                                                                                                                                       |   |                     |                         |            |                     |                       |   |                     |                 |   |                     |                    |   |                     |                            |   |                     |                     |   |                    |                   |   |                    |         |
| 2                                                                                                  | No                                                                  |                                                                                                                   |                                                                                                                                                                                                                                                                                                                                                                                                                                                                                                                                                                                                                                                       |   |                     |                         |            |                     |                       |   |                     |                 |   |                     |                    |   |                     |                            |   |                     |                     |   |                    |                   |   |                    |         |
| 3                                                                                                  | Unknown                                                             |                                                                                                                   |                                                                                                                                                                                                                                                                                                                                                                                                                                                                                                                                                                                                                                                       |   |                     |                         |            |                     |                       |   |                     |                 |   |                     |                    |   |                     |                            |   |                     |                     |   |                    |                   |   |                    |         |
| 61                                                                                                 | outcomecriterion1                                                   | Was evidence presented regarding whether the VALIDITY of this outcome measure reached an acceptable criterion?    | radio, Required<br><table border="1"> <tr><td>1</td><td>Yes</td></tr> <tr><td>2</td><td>No</td></tr> <tr><td>3</td><td>Unknown/unclear</td></tr> </table>                                                                                                                                                                                                                                                                                                                                                                                                                                                                                             | 1 | Yes                 | 2                       | No         | 3                   | Unknown/unclear       |   |                     |                 |   |                     |                    |   |                     |                            |   |                     |                     |   |                    |                   |   |                    |         |
| 1                                                                                                  | Yes                                                                 |                                                                                                                   |                                                                                                                                                                                                                                                                                                                                                                                                                                                                                                                                                                                                                                                       |   |                     |                         |            |                     |                       |   |                     |                 |   |                     |                    |   |                     |                            |   |                     |                     |   |                    |                   |   |                    |         |
| 2                                                                                                  | No                                                                  |                                                                                                                   |                                                                                                                                                                                                                                                                                                                                                                                                                                                                                                                                                                                                                                                       |   |                     |                         |            |                     |                       |   |                     |                 |   |                     |                    |   |                     |                            |   |                     |                     |   |                    |                   |   |                    |         |
| 3                                                                                                  | Unknown/unclear                                                     |                                                                                                                   |                                                                                                                                                                                                                                                                                                                                                                                                                                                                                                                                                                                                                                                       |   |                     |                         |            |                     |                       |   |                     |                 |   |                     |                    |   |                     |                            |   |                     |                     |   |                    |                   |   |                    |         |
| 62                                                                                                 | outcomecriterion2                                                   | Was evidence presented regarding whether the RELIABILITY of this outcome measure reached an acceptable criterion? | radio, Required<br><table border="1"> <tr><td>1</td><td>Yes</td></tr> <tr><td>2</td><td>No</td></tr> <tr><td>3</td><td>Unknown/unclear</td></tr> </table>                                                                                                                                                                                                                                                                                                                                                                                                                                                                                             | 1 | Yes                 | 2                       | No         | 3                   | Unknown/unclear       |   |                     |                 |   |                     |                    |   |                     |                            |   |                     |                     |   |                    |                   |   |                    |         |
| 1                                                                                                  | Yes                                                                 |                                                                                                                   |                                                                                                                                                                                                                                                                                                                                                                                                                                                                                                                                                                                                                                                       |   |                     |                         |            |                     |                       |   |                     |                 |   |                     |                    |   |                     |                            |   |                     |                     |   |                    |                   |   |                    |         |
| 2                                                                                                  | No                                                                  |                                                                                                                   |                                                                                                                                                                                                                                                                                                                                                                                                                                                                                                                                                                                                                                                       |   |                     |                         |            |                     |                       |   |                     |                 |   |                     |                    |   |                     |                            |   |                     |                     |   |                    |                   |   |                    |         |
| 3                                                                                                  | Unknown/unclear                                                     |                                                                                                                   |                                                                                                                                                                                                                                                                                                                                                                                                                                                                                                                                                                                                                                                       |   |                     |                         |            |                     |                       |   |                     |                 |   |                     |                    |   |                     |                            |   |                     |                     |   |                    |                   |   |                    |         |
| 63                                                                                                 | rater1                                                              | Was a interrater reliability threshold set?                                                                       | radio, Required<br><table border="1"> <tr><td>1</td><td>yes</td></tr> <tr><td>2</td><td>no</td></tr> <tr><td>3</td><td>unknown</td></tr> </table>                                                                                                                                                                                                                                                                                                                                                                                                                                                                                                     | 1 | yes                 | 2                       | no         | 3                   | unknown               |   |                     |                 |   |                     |                    |   |                     |                            |   |                     |                     |   |                    |                   |   |                    |         |
| 1                                                                                                  | yes                                                                 |                                                                                                                   |                                                                                                                                                                                                                                                                                                                                                                                                                                                                                                                                                                                                                                                       |   |                     |                         |            |                     |                       |   |                     |                 |   |                     |                    |   |                     |                            |   |                     |                     |   |                    |                   |   |                    |         |
| 2                                                                                                  | no                                                                  |                                                                                                                   |                                                                                                                                                                                                                                                                                                                                                                                                                                                                                                                                                                                                                                                       |   |                     |                         |            |                     |                       |   |                     |                 |   |                     |                    |   |                     |                            |   |                     |                     |   |                    |                   |   |                    |         |
| 3                                                                                                  | unknown                                                             |                                                                                                                   |                                                                                                                                                                                                                                                                                                                                                                                                                                                                                                                                                                                                                                                       |   |                     |                         |            |                     |                       |   |                     |                 |   |                     |                    |   |                     |                            |   |                     |                     |   |                    |                   |   |                    |         |
| 64                                                                                                 | interrater<br><small>Show the field ONLY if: [rater1] = '1'</small> | What threshold of inter-rater reliability was set?                                                                | text                                                                                                                                                                                                                                                                                                                                                                                                                                                                                                                                                                                                                                                  |   |                     |                         |            |                     |                       |   |                     |                 |   |                     |                    |   |                     |                            |   |                     |                     |   |                    |                   |   |                    |         |
| 65                                                                                                 | threshold                                                           | What percent interrater reliability was met?                                                                      | text                                                                                                                                                                                                                                                                                                                                                                                                                                                                                                                                                                                                                                                  |   |                     |                         |            |                     |                       |   |                     |                 |   |                     |                    |   |                     |                            |   |                     |                     |   |                    |                   |   |                    |         |
| 66                                                                                                 | outcomeadmin                                                        | How many days after the intervention was the outcome measure administered?                                        | text, Required                                                                                                                                                                                                                                                                                                                                                                                                                                                                                                                                                                                                                                        |   |                     |                         |            |                     |                       |   |                     |                 |   |                     |                    |   |                     |                            |   |                     |                     |   |                    |                   |   |                    |         |
| 67                                                                                                 | pre_post                                                            | Was the outcome measured pre and post intervention? (pre/post-testing)                                            | radio, Required<br><table border="1"> <tr><td>1</td><td>Yes</td></tr> <tr><td>2</td><td>No</td></tr> <tr><td>3</td><td>Unknown/unclear</td></tr> </table>                                                                                                                                                                                                                                                                                                                                                                                                                                                                                             | 1 | Yes                 | 2                       | No         | 3                   | Unknown/unclear       |   |                     |                 |   |                     |                    |   |                     |                            |   |                     |                     |   |                    |                   |   |                    |         |
| 1                                                                                                  | Yes                                                                 |                                                                                                                   |                                                                                                                                                                                                                                                                                                                                                                                                                                                                                                                                                                                                                                                       |   |                     |                         |            |                     |                       |   |                     |                 |   |                     |                    |   |                     |                            |   |                     |                     |   |                    |                   |   |                    |         |
| 2                                                                                                  | No                                                                  |                                                                                                                   |                                                                                                                                                                                                                                                                                                                                                                                                                                                                                                                                                                                                                                                       |   |                     |                         |            |                     |                       |   |                     |                 |   |                     |                    |   |                     |                            |   |                     |                     |   |                    |                   |   |                    |         |
| 3                                                                                                  | Unknown/unclear                                                     |                                                                                                                   |                                                                                                                                                                                                                                                                                                                                                                                                                                                                                                                                                                                                                                                       |   |                     |                         |            |                     |                       |   |                     |                 |   |                     |                    |   |                     |                            |   |                     |                     |   |                    |                   |   |                    |         |

|    |                                                                |                                                                     |                                                                                                                                                                                                                                                                                                                                                                                                                                                                                                                                                                                                                                                    |   |           |   |           |   |                 |   |                   |   |                          |   |                            |   |                      |   |                              |   |                      |    |                |    |                 |    |                        |    |       |
|----|----------------------------------------------------------------|---------------------------------------------------------------------|----------------------------------------------------------------------------------------------------------------------------------------------------------------------------------------------------------------------------------------------------------------------------------------------------------------------------------------------------------------------------------------------------------------------------------------------------------------------------------------------------------------------------------------------------------------------------------------------------------------------------------------------------|---|-----------|---|-----------|---|-----------------|---|-------------------|---|--------------------------|---|----------------------------|---|----------------------|---|------------------------------|---|----------------------|----|----------------|----|-----------------|----|------------------------|----|-------|
| 68 | followup                                                       | Was there a follow-up measurement?                                  | radio, Required<br><table border="1"> <tr><td>1</td><td>Yes</td></tr> <tr><td>2</td><td>No</td></tr> <tr><td>3</td><td>Unknown/unclear</td></tr> </table>                                                                                                                                                                                                                                                                                                                                                                                                                                                                                          | 1 | Yes       | 2 | No        | 3 | Unknown/unclear |   |                   |   |                          |   |                            |   |                      |   |                              |   |                      |    |                |    |                 |    |                        |    |       |
| 1  | Yes                                                            |                                                                     |                                                                                                                                                                                                                                                                                                                                                                                                                                                                                                                                                                                                                                                    |   |           |   |           |   |                 |   |                   |   |                          |   |                            |   |                      |   |                              |   |                      |    |                |    |                 |    |                        |    |       |
| 2  | No                                                             |                                                                     |                                                                                                                                                                                                                                                                                                                                                                                                                                                                                                                                                                                                                                                    |   |           |   |           |   |                 |   |                   |   |                          |   |                            |   |                      |   |                              |   |                      |    |                |    |                 |    |                        |    |       |
| 3  | Unknown/unclear                                                |                                                                     |                                                                                                                                                                                                                                                                                                                                                                                                                                                                                                                                                                                                                                                    |   |           |   |           |   |                 |   |                   |   |                          |   |                            |   |                      |   |                              |   |                      |    |                |    |                 |    |                        |    |       |
| 69 | followup2<br>Show the field ONLY if: [followup] = '1'          | How long after treatment was follow-up outcome administered?        | text, Required                                                                                                                                                                                                                                                                                                                                                                                                                                                                                                                                                                                                                                     |   |           |   |           |   |                 |   |                   |   |                          |   |                            |   |                      |   |                              |   |                      |    |                |    |                 |    |                        |    |       |
| 70 | stat1                                                          | Were results reported?                                              | yesno, Required<br><table border="1"> <tr><td>1</td><td>Yes</td></tr> <tr><td>0</td><td>No</td></tr> </table>                                                                                                                                                                                                                                                                                                                                                                                                                                                                                                                                      | 1 | Yes       | 0 | No        |   |                 |   |                   |   |                          |   |                            |   |                      |   |                              |   |                      |    |                |    |                 |    |                        |    |       |
| 1  | Yes                                                            |                                                                     |                                                                                                                                                                                                                                                                                                                                                                                                                                                                                                                                                                                                                                                    |   |           |   |           |   |                 |   |                   |   |                          |   |                            |   |                      |   |                              |   |                      |    |                |    |                 |    |                        |    |       |
| 0  | No                                                             |                                                                     |                                                                                                                                                                                                                                                                                                                                                                                                                                                                                                                                                                                                                                                    |   |           |   |           |   |                 |   |                   |   |                          |   |                            |   |                      |   |                              |   |                      |    |                |    |                 |    |                        |    |       |
| 71 | stat2<br>Show the field ONLY if: [stat1] = '1'                 | What type of analyses were reported?                                | radio, Required<br><table border="1"> <tr><td>1</td><td>ANOVA</td></tr> <tr><td>2</td><td>t-test</td></tr> <tr><td>3</td><td>Tau-U</td></tr> <tr><td>4</td><td>Linear Regression</td></tr> <tr><td>5</td><td>Multiple Regression</td></tr> <tr><td>6</td><td>Hierarchical Regression</td></tr> <tr><td>7</td><td>Multi-Level Modeling</td></tr> <tr><td>8</td><td>Structural Equation Modeling</td></tr> <tr><td>9</td><td>Step-Wise Regression</td></tr> <tr><td>10</td><td>Random Forests</td></tr> <tr><td>11</td><td>Visual Analysis</td></tr> <tr><td>12</td><td>Descriptive statistics</td></tr> <tr><td>13</td><td>Other</td></tr> </table> | 1 | ANOVA     | 2 | t-test    | 3 | Tau-U           | 4 | Linear Regression | 5 | Multiple Regression      | 6 | Hierarchical Regression    | 7 | Multi-Level Modeling | 8 | Structural Equation Modeling | 9 | Step-Wise Regression | 10 | Random Forests | 11 | Visual Analysis | 12 | Descriptive statistics | 13 | Other |
| 1  | ANOVA                                                          |                                                                     |                                                                                                                                                                                                                                                                                                                                                                                                                                                                                                                                                                                                                                                    |   |           |   |           |   |                 |   |                   |   |                          |   |                            |   |                      |   |                              |   |                      |    |                |    |                 |    |                        |    |       |
| 2  | t-test                                                         |                                                                     |                                                                                                                                                                                                                                                                                                                                                                                                                                                                                                                                                                                                                                                    |   |           |   |           |   |                 |   |                   |   |                          |   |                            |   |                      |   |                              |   |                      |    |                |    |                 |    |                        |    |       |
| 3  | Tau-U                                                          |                                                                     |                                                                                                                                                                                                                                                                                                                                                                                                                                                                                                                                                                                                                                                    |   |           |   |           |   |                 |   |                   |   |                          |   |                            |   |                      |   |                              |   |                      |    |                |    |                 |    |                        |    |       |
| 4  | Linear Regression                                              |                                                                     |                                                                                                                                                                                                                                                                                                                                                                                                                                                                                                                                                                                                                                                    |   |           |   |           |   |                 |   |                   |   |                          |   |                            |   |                      |   |                              |   |                      |    |                |    |                 |    |                        |    |       |
| 5  | Multiple Regression                                            |                                                                     |                                                                                                                                                                                                                                                                                                                                                                                                                                                                                                                                                                                                                                                    |   |           |   |           |   |                 |   |                   |   |                          |   |                            |   |                      |   |                              |   |                      |    |                |    |                 |    |                        |    |       |
| 6  | Hierarchical Regression                                        |                                                                     |                                                                                                                                                                                                                                                                                                                                                                                                                                                                                                                                                                                                                                                    |   |           |   |           |   |                 |   |                   |   |                          |   |                            |   |                      |   |                              |   |                      |    |                |    |                 |    |                        |    |       |
| 7  | Multi-Level Modeling                                           |                                                                     |                                                                                                                                                                                                                                                                                                                                                                                                                                                                                                                                                                                                                                                    |   |           |   |           |   |                 |   |                   |   |                          |   |                            |   |                      |   |                              |   |                      |    |                |    |                 |    |                        |    |       |
| 8  | Structural Equation Modeling                                   |                                                                     |                                                                                                                                                                                                                                                                                                                                                                                                                                                                                                                                                                                                                                                    |   |           |   |           |   |                 |   |                   |   |                          |   |                            |   |                      |   |                              |   |                      |    |                |    |                 |    |                        |    |       |
| 9  | Step-Wise Regression                                           |                                                                     |                                                                                                                                                                                                                                                                                                                                                                                                                                                                                                                                                                                                                                                    |   |           |   |           |   |                 |   |                   |   |                          |   |                            |   |                      |   |                              |   |                      |    |                |    |                 |    |                        |    |       |
| 10 | Random Forests                                                 |                                                                     |                                                                                                                                                                                                                                                                                                                                                                                                                                                                                                                                                                                                                                                    |   |           |   |           |   |                 |   |                   |   |                          |   |                            |   |                      |   |                              |   |                      |    |                |    |                 |    |                        |    |       |
| 11 | Visual Analysis                                                |                                                                     |                                                                                                                                                                                                                                                                                                                                                                                                                                                                                                                                                                                                                                                    |   |           |   |           |   |                 |   |                   |   |                          |   |                            |   |                      |   |                              |   |                      |    |                |    |                 |    |                        |    |       |
| 12 | Descriptive statistics                                         |                                                                     |                                                                                                                                                                                                                                                                                                                                                                                                                                                                                                                                                                                                                                                    |   |           |   |           |   |                 |   |                   |   |                          |   |                            |   |                      |   |                              |   |                      |    |                |    |                 |    |                        |    |       |
| 13 | Other                                                          |                                                                     |                                                                                                                                                                                                                                                                                                                                                                                                                                                                                                                                                                                                                                                    |   |           |   |           |   |                 |   |                   |   |                          |   |                            |   |                      |   |                              |   |                      |    |                |    |                 |    |                        |    |       |
| 72 | effectsize1                                                    | Were effect sizes reported?                                         | yesno, Required<br><table border="1"> <tr><td>1</td><td>Yes</td></tr> <tr><td>0</td><td>No</td></tr> </table>                                                                                                                                                                                                                                                                                                                                                                                                                                                                                                                                      | 1 | Yes       | 0 | No        |   |                 |   |                   |   |                          |   |                            |   |                      |   |                              |   |                      |    |                |    |                 |    |                        |    |       |
| 1  | Yes                                                            |                                                                     |                                                                                                                                                                                                                                                                                                                                                                                                                                                                                                                                                                                                                                                    |   |           |   |           |   |                 |   |                   |   |                          |   |                            |   |                      |   |                              |   |                      |    |                |    |                 |    |                        |    |       |
| 0  | No                                                             |                                                                     |                                                                                                                                                                                                                                                                                                                                                                                                                                                                                                                                                                                                                                                    |   |           |   |           |   |                 |   |                   |   |                          |   |                            |   |                      |   |                              |   |                      |    |                |    |                 |    |                        |    |       |
| 73 | effectsize_type<br>Show the field ONLY if: [effectsize1] = '1' | What type of effect size measure is reported?                       | radio<br><table border="1"> <tr><td>1</td><td>cohen's d</td></tr> <tr><td>2</td><td>pearson r</td></tr> <tr><td>3</td><td>hedges' g</td></tr> <tr><td>4</td><td>glass</td></tr> <tr><td>5</td><td>eta-squared (or partial)</td></tr> <tr><td>6</td><td>omega-squared (or partial)</td></tr> <tr><td>7</td><td>tau-U</td></tr> <tr><td>8</td><td>other</td></tr> </table>                                                                                                                                                                                                                                                                           | 1 | cohen's d | 2 | pearson r | 3 | hedges' g       | 4 | glass             | 5 | eta-squared (or partial) | 6 | omega-squared (or partial) | 7 | tau-U                | 8 | other                        |   |                      |    |                |    |                 |    |                        |    |       |
| 1  | cohen's d                                                      |                                                                     |                                                                                                                                                                                                                                                                                                                                                                                                                                                                                                                                                                                                                                                    |   |           |   |           |   |                 |   |                   |   |                          |   |                            |   |                      |   |                              |   |                      |    |                |    |                 |    |                        |    |       |
| 2  | pearson r                                                      |                                                                     |                                                                                                                                                                                                                                                                                                                                                                                                                                                                                                                                                                                                                                                    |   |           |   |           |   |                 |   |                   |   |                          |   |                            |   |                      |   |                              |   |                      |    |                |    |                 |    |                        |    |       |
| 3  | hedges' g                                                      |                                                                     |                                                                                                                                                                                                                                                                                                                                                                                                                                                                                                                                                                                                                                                    |   |           |   |           |   |                 |   |                   |   |                          |   |                            |   |                      |   |                              |   |                      |    |                |    |                 |    |                        |    |       |
| 4  | glass                                                          |                                                                     |                                                                                                                                                                                                                                                                                                                                                                                                                                                                                                                                                                                                                                                    |   |           |   |           |   |                 |   |                   |   |                          |   |                            |   |                      |   |                              |   |                      |    |                |    |                 |    |                        |    |       |
| 5  | eta-squared (or partial)                                       |                                                                     |                                                                                                                                                                                                                                                                                                                                                                                                                                                                                                                                                                                                                                                    |   |           |   |           |   |                 |   |                   |   |                          |   |                            |   |                      |   |                              |   |                      |    |                |    |                 |    |                        |    |       |
| 6  | omega-squared (or partial)                                     |                                                                     |                                                                                                                                                                                                                                                                                                                                                                                                                                                                                                                                                                                                                                                    |   |           |   |           |   |                 |   |                   |   |                          |   |                            |   |                      |   |                              |   |                      |    |                |    |                 |    |                        |    |       |
| 7  | tau-U                                                          |                                                                     |                                                                                                                                                                                                                                                                                                                                                                                                                                                                                                                                                                                                                                                    |   |           |   |           |   |                 |   |                   |   |                          |   |                            |   |                      |   |                              |   |                      |    |                |    |                 |    |                        |    |       |
| 8  | other                                                          |                                                                     |                                                                                                                                                                                                                                                                                                                                                                                                                                                                                                                                                                                                                                                    |   |           |   |           |   |                 |   |                   |   |                          |   |                            |   |                      |   |                              |   |                      |    |                |    |                 |    |                        |    |       |
| 74 | effectsize2<br>Show the field ONLY if: [effectsize1] = '1'     | What was the reported effect size?                                  | text, Required                                                                                                                                                                                                                                                                                                                                                                                                                                                                                                                                                                                                                                     |   |           |   |           |   |                 |   |                   |   |                          |   |                            |   |                      |   |                              |   |                      |    |                |    |                 |    |                        |    |       |
| 75 | significance1                                                  | Were reported effects significant/was the null hypothesis rejected? | radio, Required<br><table border="1"> <tr><td>1</td><td>yes</td></tr> <tr><td>2</td><td>no</td></tr> <tr><td>3</td><td>unknown</td></tr> </table>                                                                                                                                                                                                                                                                                                                                                                                                                                                                                                  | 1 | yes       | 2 | no        | 3 | unknown         |   |                   |   |                          |   |                            |   |                      |   |                              |   |                      |    |                |    |                 |    |                        |    |       |
| 1  | yes                                                            |                                                                     |                                                                                                                                                                                                                                                                                                                                                                                                                                                                                                                                                                                                                                                    |   |           |   |           |   |                 |   |                   |   |                          |   |                            |   |                      |   |                              |   |                      |    |                |    |                 |    |                        |    |       |
| 2  | no                                                             |                                                                     |                                                                                                                                                                                                                                                                                                                                                                                                                                                                                                                                                                                                                                                    |   |           |   |           |   |                 |   |                   |   |                          |   |                            |   |                      |   |                              |   |                      |    |                |    |                 |    |                        |    |       |
| 3  | unknown                                                        |                                                                     |                                                                                                                                                                                                                                                                                                                                                                                                                                                                                                                                                                                                                                                    |   |           |   |           |   |                 |   |                   |   |                          |   |                            |   |                      |   |                              |   |                      |    |                |    |                 |    |                        |    |       |
| 76 | causality<br>Show the field ONLY if: [significance1] = '1'     | Do authors claim causality of the intervention on the outcome?      | yesno, Required<br><table border="1"> <tr><td>1</td><td>Yes</td></tr> <tr><td>0</td><td>No</td></tr> </table>                                                                                                                                                                                                                                                                                                                                                                                                                                                                                                                                      | 1 | Yes       | 0 | No        |   |                 |   |                   |   |                          |   |                            |   |                      |   |                              |   |                      |    |                |    |                 |    |                        |    |       |
| 1  | Yes                                                            |                                                                     |                                                                                                                                                                                                                                                                                                                                                                                                                                                                                                                                                                                                                                                    |   |           |   |           |   |                 |   |                   |   |                          |   |                            |   |                      |   |                              |   |                      |    |                |    |                 |    |                        |    |       |
| 0  | No                                                             |                                                                     |                                                                                                                                                                                                                                                                                                                                                                                                                                                                                                                                                                                                                                                    |   |           |   |           |   |                 |   |                   |   |                          |   |                            |   |                      |   |                              |   |                      |    |                |    |                 |    |                        |    |       |



|    |                                                             |                                                            |                                                        |
|----|-------------------------------------------------------------|------------------------------------------------------------|--------------------------------------------------------|
| 77 | causality2<br>Show the field ONLY if:<br>[causality] = '1'  | Does cause precede outcome? (Is there temporal precedence) | yesno, Required<br>1 Yes<br>0 No                       |
| 78 | causality3<br>Show the field ONLY if:<br>[causality] = '1'  | Any other explanations for outcome?                        | yesno, Required<br>1 Yes<br>0 No                       |
| 79 | causality4<br>Show the field ONLY if:<br>[causality3] = '1' | What are the other explanations for the outcome?           | text, Required                                         |
| 80 | outcome_measure_complete                                    | Section Header: <i>Form Status</i><br>Complete?            | dropdown<br>0 Incomplete<br>1 Unverified<br>2 Complete |

Instrument: **CEC Quality Scale** (cec\_quality\_scale)[^ Collapse](#)

|    |          |                                                                                                                                                                                                                                                                                                                                                                                                 |                                  |
|----|----------|-------------------------------------------------------------------------------------------------------------------------------------------------------------------------------------------------------------------------------------------------------------------------------------------------------------------------------------------------------------------------------------------------|----------------------------------|
| 81 | cec1_0   | 1.0. Context and setting. The study provides sufficient information regarding the critical features of the context or setting.                                                                                                                                                                                                                                                                  | yesno, Required<br>1 Yes<br>0 No |
| 82 | cec1_0_2 | 1.1. The study describes critical features of the context or setting relevant to the review; for example, type of program or classroom, type of school (e.g., public, private, charter, preschool), curriculum, geographic location, community setting, socioeconomic status, physical layout. (comment)                                                                                        | text, Required                   |
| 83 | cec2_0   | 2.0. Participants. The study provides sufficient information to identify the population of participants to which results may be generalized and to determine or confirm whether the participants demonstrated the disability or difficulty of focus.                                                                                                                                            | yesno, Required<br>1 Yes<br>0 No |
| 84 | cec2_1   | 2.1. The study describes participant demographics relevant to the review (e.g., gender, age/grade, race/ethnicity, socioeconomic status, language status). (comment)                                                                                                                                                                                                                            | text, Required                   |
| 85 | cec2_2   | 2.2. The study describes disability or risk status of the participants (e.g., specific learning disability, autism spectrum disorder, behavior problem, at risk for reading failure) and method for determining status (e.g., identified by school using state IDEA criteria, teacher nomination, standardized intelligence test, curriculum-based measurement probes, rating scale). (comment) | text, Required                   |
| 86 | cec3_0   | 3.0. Intervention agent. The study provides sufficient information regarding the critical features of the intervention agent.                                                                                                                                                                                                                                                                   | yesno, Required<br>1 Yes<br>0 No |
| 87 | cec3_1   | 3.1. The study describes the role of the intervention agent (e.g., teacher, researcher, paraprofessional, parent, volunteer, peer tutor, sibling, technological device/computer) and, as relevant to the review, background variables (e.g., race/ethnicity, educational background/licensure). (comment)                                                                                       | text, Required                   |
| 88 | cec3_2   | 3.2. The study describes any specific training (e.g., amount of training, training to a criterion) or qualifications (e.g., professional credential) required to implement the intervention, and indicates that the interventionist has achieved them. (comment)                                                                                                                                | text, Required                   |

|    |             |                                                                                                                                                                                                                                                                                                                                                                                                                                                                                                                 |                                                                                                                                                                                                                     |   |            |   |             |   |           |   |         |
|----|-------------|-----------------------------------------------------------------------------------------------------------------------------------------------------------------------------------------------------------------------------------------------------------------------------------------------------------------------------------------------------------------------------------------------------------------------------------------------------------------------------------------------------------------|---------------------------------------------------------------------------------------------------------------------------------------------------------------------------------------------------------------------|---|------------|---|-------------|---|-----------|---|---------|
| 89 | cec4_1      | 4.1. The study describes detailed intervention procedures (e.g., intervention components, instructional behaviors, critical or active elements, manualized or scripted procedures, dosage) and intervention agents' actions (e.g., prompts, verbalizations, physical behaviors, proximity), or cites one or more accessible sources that provide this information. (comment)                                                                                                                                    | text, Required                                                                                                                                                                                                      |   |            |   |             |   |           |   |         |
| 90 | cec4_0      | 4.0. Description of practice. The study provides sufficient information regarding the critical features of the practice (intervention), such that the practice is clearly understood and can be reasonably replicated.                                                                                                                                                                                                                                                                                          | yesno, Required<br><table border="1"> <tr> <td>1</td> <td>Yes</td> </tr> <tr> <td>0</td> <td>No</td> </tr> </table>                                                                                                 | 1 | Yes        | 0 | No          |   |           |   |         |
| 1  | Yes         |                                                                                                                                                                                                                                                                                                                                                                                                                                                                                                                 |                                                                                                                                                                                                                     |   |            |   |             |   |           |   |         |
| 0  | No          |                                                                                                                                                                                                                                                                                                                                                                                                                                                                                                                 |                                                                                                                                                                                                                     |   |            |   |             |   |           |   |         |
| 91 | cec4_2      | 4.2. When relevant, the study describes materials (e.g., manipulatives, worksheets, timers, cues, toys), or cites one or more accessible sources providing this information.                                                                                                                                                                                                                                                                                                                                    | yesno, Required<br><table border="1"> <tr> <td>1</td> <td>Yes</td> </tr> <tr> <td>0</td> <td>No</td> </tr> </table>                                                                                                 | 1 | Yes        | 0 | No          |   |           |   |         |
| 1  | Yes         |                                                                                                                                                                                                                                                                                                                                                                                                                                                                                                                 |                                                                                                                                                                                                                     |   |            |   |             |   |           |   |         |
| 0  | No          |                                                                                                                                                                                                                                                                                                                                                                                                                                                                                                                 |                                                                                                                                                                                                                     |   |            |   |             |   |           |   |         |
| 92 | cec5_0      | 5.0. Implementation fidelity. The practice is implemented with fidelity.                                                                                                                                                                                                                                                                                                                                                                                                                                        | yesno, Required<br><table border="1"> <tr> <td>1</td> <td>Yes</td> </tr> <tr> <td>0</td> <td>No</td> </tr> </table>                                                                                                 | 1 | Yes        | 0 | No          |   |           |   |         |
| 1  | Yes         |                                                                                                                                                                                                                                                                                                                                                                                                                                                                                                                 |                                                                                                                                                                                                                     |   |            |   |             |   |           |   |         |
| 0  | No          |                                                                                                                                                                                                                                                                                                                                                                                                                                                                                                                 |                                                                                                                                                                                                                     |   |            |   |             |   |           |   |         |
| 93 | cec5_1      | 5.1. The study assesses and reports implementation fidelity related to adherence using direct, reliable measures (e.g., observations using a checklist of critical elements of the practice). (comment)                                                                                                                                                                                                                                                                                                         | text, Required                                                                                                                                                                                                      |   |            |   |             |   |           |   |         |
| 94 | cec5_2      | 5.2. The study assesses and reports implementation fidelity related to dosage or exposure using direct, reliable measures (e.g., observations or self-report of the duration, frequency, curriculum coverage of implementation). (comment)                                                                                                                                                                                                                                                                      | text, Required                                                                                                                                                                                                      |   |            |   |             |   |           |   |         |
| 95 | cec5_3      | 5.3. As appropriate, the study assesses and reports implementation fidelity (a) regularly throughout implementation of the intervention (e.g., beginning, middle, end of the intervention period), and (b) for each interventionist, each setting, and each participant or other unit of analysis. If either adherence or dosage is assessed and reported, this item applies to the type of fidelity assessed. If neither adherence nor dosage is assessed and reported, this item is not applicable. (comment) | text, Required                                                                                                                                                                                                      |   |            |   |             |   |           |   |         |
| 96 | cec6_0      | 6.0. Internal validity. The independent variable is under the control of experimenter. The study describes the services provided in control and comparison conditions and phases. The research design provides sufficient evidence that the independent variable causes change in the dependent variable or variables. Participants stayed with the study, so attrition is not a significant threat to internal validity.                                                                                       | radio, Required<br><table border="1"> <tr> <td>1</td> <td>Yes to all</td> </tr> <tr> <td>2</td> <td>Yes to some</td> </tr> <tr> <td>3</td> <td>No to all</td> </tr> <tr> <td>4</td> <td>Unknown</td> </tr> </table> | 1 | Yes to all | 2 | Yes to some | 3 | No to all | 4 | Unknown |
| 1  | Yes to all  |                                                                                                                                                                                                                                                                                                                                                                                                                                                                                                                 |                                                                                                                                                                                                                     |   |            |   |             |   |           |   |         |
| 2  | Yes to some |                                                                                                                                                                                                                                                                                                                                                                                                                                                                                                                 |                                                                                                                                                                                                                     |   |            |   |             |   |           |   |         |
| 3  | No to all   |                                                                                                                                                                                                                                                                                                                                                                                                                                                                                                                 |                                                                                                                                                                                                                     |   |            |   |             |   |           |   |         |
| 4  | Unknown     |                                                                                                                                                                                                                                                                                                                                                                                                                                                                                                                 |                                                                                                                                                                                                                     |   |            |   |             |   |           |   |         |
| 97 | cec6_1      | 6.1. The researcher controls and systematically manipulates the independent variable. (comment)                                                                                                                                                                                                                                                                                                                                                                                                                 | text, Required                                                                                                                                                                                                      |   |            |   |             |   |           |   |         |
| 98 | cec6_2      | 6.2. The study describes baseline (single-subject studies) or control/comparison (group comparison studies) conditions, such as the curriculum, instruction, and interventions (e.g., definition, duration, length, frequency, learner: instructor ratio). (comment)                                                                                                                                                                                                                                            | text, Required                                                                                                                                                                                                      |   |            |   |             |   |           |   |         |
| 99 | cec6_3      | 6.3. Control/comparison-condition or baseline-condition participants have no or extremely limited access to the treatment intervention. (comment)                                                                                                                                                                                                                                                                                                                                                               | text, Required                                                                                                                                                                                                      |   |            |   |             |   |           |   |         |

|     |        |                                                                                                                                                                                                                                                                                                                                                                                                                                                                                                                                                                                                                                                                                                                                                                                                                                                                                                                                                                                                                                    |                                                                                                                     |   |     |   |    |
|-----|--------|------------------------------------------------------------------------------------------------------------------------------------------------------------------------------------------------------------------------------------------------------------------------------------------------------------------------------------------------------------------------------------------------------------------------------------------------------------------------------------------------------------------------------------------------------------------------------------------------------------------------------------------------------------------------------------------------------------------------------------------------------------------------------------------------------------------------------------------------------------------------------------------------------------------------------------------------------------------------------------------------------------------------------------|---------------------------------------------------------------------------------------------------------------------|---|-----|---|----|
| 100 | cec6_4 | 6.4. The study clearly describes assignment to groups, which involves participants (or classrooms, schools, or other unit of analysis) being assigned to groups in one of the following ways:<br>(a) randomly;<br>(b) nonrandomly, but the comparison groups are matched very closely to the intervention group (e.g., matched on prior test scores, demographics, a propensity score; see Song & Herman, 2010);<br>(c) nonrandomly, but techniques are used to measure differences and, if meaningful differences are identified- for example, statistically significant difference, difference greater than 5% of a standard deviation (What Works Clearinghouse, 2011)-to statistically control for any differences between groups on relevant pretest scores or demographic characteristics (e.g., statistically adjust for confounding variable through techniques such as ANCOVA or propensity score analysis); or<br>(d) nonrandomly on the basis of a reasonable cutoff point (regression discontinuity design). (comment) | text, Required                                                                                                      |   |     |   |    |
| 101 | cec6_5 | 6.5. The design provides at least three demonstrations of experimental effects at three different times. (comment)                                                                                                                                                                                                                                                                                                                                                                                                                                                                                                                                                                                                                                                                                                                                                                                                                                                                                                                 | text, Required                                                                                                      |   |     |   |    |
| 102 | cec6_6 | 6.6. For single-subject research designs with a baseline phase (alternating treatment designs do not require a baseline), all baseline phases include at least three data points (except when fewer are justified by study author due to reasons such as measuring severe or dangerous problem behaviors and zero baseline behaviors with no likelihood of improvement without intervention) and establish a pattern that predicts undesirable future performance (e.g., increasing trend in problem behavior, consistently infrequent exhibition of appropriate behavior, highly variable behavior). (comment)                                                                                                                                                                                                                                                                                                                                                                                                                    | text, Required                                                                                                      |   |     |   |    |
| 103 | cec6_7 | 6.7. The design controls for common threats to internal validity (e.g., ambiguous temporal precedence, history, maturation, diffusion) so plausible, alternative explanations for findings can be reasonably ruled out. Commonly accepted designs such as reversal (ABAB), multiple-baseline, changing criterion, and alternating treatment address this quality indicator when properly designed and executed, although other approaches can be accepted if study authors justify how they ruled out alternative explanations for findings or control for common threats to internal validity. (comment)                                                                                                                                                                                                                                                                                                                                                                                                                          | text, Required                                                                                                      |   |     |   |    |
| 104 | cec6_8 | 6.8. Overall attrition is low across groups (e.g., < 30% in a 1-year study). (comment)                                                                                                                                                                                                                                                                                                                                                                                                                                                                                                                                                                                                                                                                                                                                                                                                                                                                                                                                             | text, Required                                                                                                      |   |     |   |    |
| 105 | cec6_9 | 6.9. Differential attrition (between groups) is low (e.g., ≤10%) or is controlled for by adjusting for noncompleters (e.g., conducting intent-to-treat analysis). (comment)                                                                                                                                                                                                                                                                                                                                                                                                                                                                                                                                                                                                                                                                                                                                                                                                                                                        | text, Required                                                                                                      |   |     |   |    |
| 106 | cec7_0 | 7.0. Outcome measures/dependent variables. Outcome measures are applied appropriately to gauge the effect of the practice on study outcomes. Outcome measures demonstrate adequate psychometrics.                                                                                                                                                                                                                                                                                                                                                                                                                                                                                                                                                                                                                                                                                                                                                                                                                                  | yesno, Required<br><table border="1"> <tr> <td>1</td> <td>Yes</td> </tr> <tr> <td>0</td> <td>No</td> </tr> </table> | 1 | Yes | 0 | No |
| 1   | Yes    |                                                                                                                                                                                                                                                                                                                                                                                                                                                                                                                                                                                                                                                                                                                                                                                                                                                                                                                                                                                                                                    |                                                                                                                     |   |     |   |    |
| 0   | No     |                                                                                                                                                                                                                                                                                                                                                                                                                                                                                                                                                                                                                                                                                                                                                                                                                                                                                                                                                                                                                                    |                                                                                                                     |   |     |   |    |
| 107 | cec7_1 | 7.1. Outcomes are socially important (e.g., they constitute or are theoretically or empirically linked to improved quality of life, an important developmental/learning outcome, or both). (comment)                                                                                                                                                                                                                                                                                                                                                                                                                                                                                                                                                                                                                                                                                                                                                                                                                               | text, Required                                                                                                      |   |     |   |    |
| 108 | cec7_2 | 7.2. The study clearly defines and describes measurement of the dependent variables.                                                                                                                                                                                                                                                                                                                                                                                                                                                                                                                                                                                                                                                                                                                                                                                                                                                                                                                                               | yesno, Required<br><table border="1"> <tr> <td>1</td> <td>Yes</td> </tr> <tr> <td>0</td> <td>No</td> </tr> </table> | 1 | Yes | 0 | No |
| 1   | Yes    |                                                                                                                                                                                                                                                                                                                                                                                                                                                                                                                                                                                                                                                                                                                                                                                                                                                                                                                                                                                                                                    |                                                                                                                     |   |     |   |    |
| 0   | No     |                                                                                                                                                                                                                                                                                                                                                                                                                                                                                                                                                                                                                                                                                                                                                                                                                                                                                                                                                                                                                                    |                                                                                                                     |   |     |   |    |
| 109 | cec7_3 | 7.3. The study reports the effects of the intervention on all measures of the outcome targeted by the review (p levels and effect sizes or data from which effect sizes can be calculated for group comparison studies; graphed data for single-subject studies), not just those for which a positive effect is found.                                                                                                                                                                                                                                                                                                                                                                                                                                                                                                                                                                                                                                                                                                             | yesno, Required<br><table border="1"> <tr> <td>1</td> <td>Yes</td> </tr> <tr> <td>0</td> <td>No</td> </tr> </table> | 1 | Yes | 0 | No |
| 1   | Yes    |                                                                                                                                                                                                                                                                                                                                                                                                                                                                                                                                                                                                                                                                                                                                                                                                                                                                                                                                                                                                                                    |                                                                                                                     |   |     |   |    |
| 0   | No     |                                                                                                                                                                                                                                                                                                                                                                                                                                                                                                                                                                                                                                                                                                                                                                                                                                                                                                                                                                                                                                    |                                                                                                                     |   |     |   |    |

|     |                                                                 |                                                                                                                                                                                                                                                                                                                                                                                                                                                                                                                                                                                                                                                     |                                                                                                                                                            |   |            |   |            |   |          |
|-----|-----------------------------------------------------------------|-----------------------------------------------------------------------------------------------------------------------------------------------------------------------------------------------------------------------------------------------------------------------------------------------------------------------------------------------------------------------------------------------------------------------------------------------------------------------------------------------------------------------------------------------------------------------------------------------------------------------------------------------------|------------------------------------------------------------------------------------------------------------------------------------------------------------|---|------------|---|------------|---|----------|
| 110 | cec7_4                                                          | 7.4. Frequency and timing of outcome measures are appropriate. For most single-subject studies, a minimum of three data points per phase is necessary if a given phase is to be considered as part of a possible demonstration of experimental effect (except when fewer are justified by study author due to reasons such as measuring severe or dangerous problem behaviors and zero baseline behaviors with no likelihood of improvement without intervention). For alternating treatment designs, at least four repetitions of the alternating sequence are required (e.g., ABABABAB; see Kratochwill et al., 2013).                            | yesno, Required<br><table border="1"> <tr><td>1</td><td>Yes</td></tr> <tr><td>0</td><td>No</td></tr> </table>                                              | 1 | Yes        | 0 | No         |   |          |
| 1   | Yes                                                             |                                                                                                                                                                                                                                                                                                                                                                                                                                                                                                                                                                                                                                                     |                                                                                                                                                            |   |            |   |            |   |          |
| 0   | No                                                              |                                                                                                                                                                                                                                                                                                                                                                                                                                                                                                                                                                                                                                                     |                                                                                                                                                            |   |            |   |            |   |          |
| 111 | cec7_5                                                          | 7.5. The study provides evidence of adequate internal reliability, interobserver reliability, test-retest reliability, or parallel-form reliability, as relevant (e.g., score reliability coefficient $\geq .80$ , interobserver agreement $\geq 80\%$ , kappa $\geq 60\%$ ).                                                                                                                                                                                                                                                                                                                                                                       | yesno, Required<br><table border="1"> <tr><td>1</td><td>Yes</td></tr> <tr><td>0</td><td>No</td></tr> </table>                                              | 1 | Yes        | 0 | No         |   |          |
| 1   | Yes                                                             |                                                                                                                                                                                                                                                                                                                                                                                                                                                                                                                                                                                                                                                     |                                                                                                                                                            |   |            |   |            |   |          |
| 0   | No                                                              |                                                                                                                                                                                                                                                                                                                                                                                                                                                                                                                                                                                                                                                     |                                                                                                                                                            |   |            |   |            |   |          |
| 112 | cec7_6                                                          | 7.6. The study provides adequate evidence of validity, such as content, construct, criterion (concurrent or predictive), or social validity.                                                                                                                                                                                                                                                                                                                                                                                                                                                                                                        | yesno, Required<br><table border="1"> <tr><td>1</td><td>Yes</td></tr> <tr><td>0</td><td>No</td></tr> </table>                                              | 1 | Yes        | 0 | No         |   |          |
| 1   | Yes                                                             |                                                                                                                                                                                                                                                                                                                                                                                                                                                                                                                                                                                                                                                     |                                                                                                                                                            |   |            |   |            |   |          |
| 0   | No                                                              |                                                                                                                                                                                                                                                                                                                                                                                                                                                                                                                                                                                                                                                     |                                                                                                                                                            |   |            |   |            |   |          |
| 113 | cec8_0                                                          | 8.0. Data Analysis. Data analysis is conducted appropriately. The study reports information on effect size.                                                                                                                                                                                                                                                                                                                                                                                                                                                                                                                                         | yesno, Required<br><table border="1"> <tr><td>1</td><td>Yes</td></tr> <tr><td>0</td><td>No</td></tr> </table>                                              | 1 | Yes        | 0 | No         |   |          |
| 1   | Yes                                                             |                                                                                                                                                                                                                                                                                                                                                                                                                                                                                                                                                                                                                                                     |                                                                                                                                                            |   |            |   |            |   |          |
| 0   | No                                                              |                                                                                                                                                                                                                                                                                                                                                                                                                                                                                                                                                                                                                                                     |                                                                                                                                                            |   |            |   |            |   |          |
| 114 | cec8_1<br><small>Show the field ONLY if: [cec8_0] = '1'</small> | 8.1. Data analysis techniques are appropriate for comparing change in performance of two or more groups (e.g., t tests, ANOVAs/MANOVAs, ANCOVAs/MANCOVAs, hierarchical linear modeling, structural equation modeling). If atypical procedures are used, the study provides a rationale justifying the data analysis techniques.                                                                                                                                                                                                                                                                                                                     | yesno, Required<br><table border="1"> <tr><td>1</td><td>Yes</td></tr> <tr><td>0</td><td>No</td></tr> </table>                                              | 1 | Yes        | 0 | No         |   |          |
| 1   | Yes                                                             |                                                                                                                                                                                                                                                                                                                                                                                                                                                                                                                                                                                                                                                     |                                                                                                                                                            |   |            |   |            |   |          |
| 0   | No                                                              |                                                                                                                                                                                                                                                                                                                                                                                                                                                                                                                                                                                                                                                     |                                                                                                                                                            |   |            |   |            |   |          |
| 115 | cec8_2                                                          | 8.2. The study provides a single-subject graph clearly representing outcome data across all study phases for each unit of analysis (e.g., individual, classroom, other group of individuals) to enable determination of the effects of the practice. Regardless of whether the study report includes visual or other analyses of data, graphs depicting all relevant dependent variables targeted by the review should be clear enough for reviewers to draw basic conclusions about experimental control using traditional visual analysis techniques (i.e., analysis of mean, level, trend, overlap, consistency of data patterns across phases). | yesno, Required<br><table border="1"> <tr><td>1</td><td>Yes</td></tr> <tr><td>0</td><td>No</td></tr> </table>                                              | 1 | Yes        | 0 | No         |   |          |
| 1   | Yes                                                             |                                                                                                                                                                                                                                                                                                                                                                                                                                                                                                                                                                                                                                                     |                                                                                                                                                            |   |            |   |            |   |          |
| 0   | No                                                              |                                                                                                                                                                                                                                                                                                                                                                                                                                                                                                                                                                                                                                                     |                                                                                                                                                            |   |            |   |            |   |          |
| 116 | cec8_3                                                          | 8.3. The study reports one or more appropriate effect size statistic (e.g., Cohen's d, Hedge's G, Glass's $\Delta$ , $\eta^2$ ) for all outcomes relevant to the review being conducted, even if the outcome is not statistically significant, or provides data from which appropriate effect sizes can be calculated. (comment)                                                                                                                                                                                                                                                                                                                    | text, Required                                                                                                                                             |   |            |   |            |   |          |
| 117 | cec_quality_scale_complete                                      | Section Header: <i>Form Status</i><br>Complete?                                                                                                                                                                                                                                                                                                                                                                                                                                                                                                                                                                                                     | dropdown<br><table border="1"> <tr><td>0</td><td>Incomplete</td></tr> <tr><td>1</td><td>Unverified</td></tr> <tr><td>2</td><td>Complete</td></tr> </table> | 0 | Incomplete | 1 | Unverified | 2 | Complete |
| 0   | Incomplete                                                      |                                                                                                                                                                                                                                                                                                                                                                                                                                                                                                                                                                                                                                                     |                                                                                                                                                            |   |            |   |            |   |          |
| 1   | Unverified                                                      |                                                                                                                                                                                                                                                                                                                                                                                                                                                                                                                                                                                                                                                     |                                                                                                                                                            |   |            |   |            |   |          |
| 2   | Complete                                                        |                                                                                                                                                                                                                                                                                                                                                                                                                                                                                                                                                                                                                                                     |                                                                                                                                                            |   |            |   |            |   |          |

Instrument: **Coder/Coding Quality Characteristics** (codercoding\_quality\_characteristics) [^ Collapse](#)

|     |                                              |                                                 |                                                                                                                                                            |   |            |   |            |   |          |
|-----|----------------------------------------------|-------------------------------------------------|------------------------------------------------------------------------------------------------------------------------------------------------------------|---|------------|---|------------|---|----------|
| 118 | name                                         | Coder Name                                      | text, Required                                                                                                                                             |   |            |   |            |   |          |
| 119 | date                                         | Date coded                                      | text (date_dmy), Required                                                                                                                                  |   |            |   |            |   |          |
| 120 | timecode                                     | Time to code (minutes)                          | text, Required                                                                                                                                             |   |            |   |            |   |          |
| 121 | codercoding_quality_characteristics_complete | Section Header: <i>Form Status</i><br>Complete? | dropdown<br><table border="1"> <tr><td>0</td><td>Incomplete</td></tr> <tr><td>1</td><td>Unverified</td></tr> <tr><td>2</td><td>Complete</td></tr> </table> | 0 | Incomplete | 1 | Unverified | 2 | Complete |
| 0   | Incomplete                                   |                                                 |                                                                                                                                                            |   |            |   |            |   |          |
| 1   | Unverified                                   |                                                 |                                                                                                                                                            |   |            |   |            |   |          |
| 2   | Complete                                     |                                                 |                                                                                                                                                            |   |            |   |            |   |          |
